# Supplementary material for: Description of the epidemiological characteristics of work-related eye injuries in Spain: a retrospective study
Source: PubMed Central journal article supplement — BMJ Open. 2020 Oct 15;10(10):e035696. doi: 10.1136/bmjopen-2019-035696 (PMC7566727; doi:10.1136/bmjopen-2019-035696), 2020-10-15
Supplement: bmjopen-2019-035696.draft_revisions.pdf [file bmjopen-2019-035696.draft_revisions.pdf]

# BMJ Open

BMJ Open is committed to open peer review. As part of this commitment we make the peer review history of every article we publish publicly available.

When an article is published we post the peer reviewers' comments and the authors' responses online. We also post the versions of the paper that were used during peer review. These are the versions that the peer review comments apply to.

The versions of the paper that follow are the versions that were submitted during the peer review process. They are not the versions of record or the final published versions. They should not be cited or distributed as the published version of this manuscript.

BMJ Open is an open access journal and the full, final, typeset and author-corrected version of record of the manuscript is available on our site with no access controls, subscription charges or pay-per-view fees (<http://bmjopen.bmj.com>).

If you have any questions on BMJ Open's open peer review process please email [info.bmjopen@bmj.com](mailto:info.bmjopen@bmj.com)

# BMJ Open

## Eye Injury epidemiology of workers by age, sex and occupation over the last 10 years in Spain

|                               |                                                                                                                                                                                                                                                                                                                                                                                                                                                                                                                                                                                                                                                                                                                                                                                                                                                                                 |
|-------------------------------|---------------------------------------------------------------------------------------------------------------------------------------------------------------------------------------------------------------------------------------------------------------------------------------------------------------------------------------------------------------------------------------------------------------------------------------------------------------------------------------------------------------------------------------------------------------------------------------------------------------------------------------------------------------------------------------------------------------------------------------------------------------------------------------------------------------------------------------------------------------------------------|
| Journal:                      | <i>BMJ Open</i>                                                                                                                                                                                                                                                                                                                                                                                                                                                                                                                                                                                                                                                                                                                                                                                                                                                                 |
| Manuscript ID                 | bmjopen-2019-035696                                                                                                                                                                                                                                                                                                                                                                                                                                                                                                                                                                                                                                                                                                                                                                                                                                                             |
| Article Type:                 | Original research                                                                                                                                                                                                                                                                                                                                                                                                                                                                                                                                                                                                                                                                                                                                                                                                                                                               |
| Date Submitted by the Author: | 12-Nov-2019                                                                                                                                                                                                                                                                                                                                                                                                                                                                                                                                                                                                                                                                                                                                                                                                                                                                     |
| Complete List of Authors:     | Martin Prieto, Sergio; Universidad Europea de Madrid Campus de Villaviciosa de Odón, Biomedical and Health Science School<br>Álvarez Peregrina, Cristina; Universidad Europea de Madrid Campus de Villaviciosa de Odón, School of Biomedical and Health Sciences<br>Thuissard-Vasallo, Israel; Universidad Europea de Madrid Campus de Villaviciosa de Odón, Biomedical and Health Science School<br>Catalina Romero, Carlos; Ibermutua (Mutua de accidentes de trabajo y enfermedades profesionales nº 274)<br>Calvo Bonacho, Eva; Ibermutua (Mutua de accidentes de trabajo y enfermedades profesionales nº 274)<br>Villa Collar, César; Universidad Europea de Madrid Campus de Villaviciosa de Odón, Biomedical and Health Science School<br>Sánchez Tena, Miguel Ángel; Universidad Europea de Madrid Campus de Villaviciosa de Odón, Biomedical and Health Science School |
| Keywords:                     | ACCIDENT & EMERGENCY MEDICINE, EPIDEMIOLOGY, Health & safety < HEALTH SERVICES ADMINISTRATION & MANAGEMENT, OCCUPATIONAL & INDUSTRIAL MEDICINE, Medical ophthalmology < OPHTHALMOLOGY                                                                                                                                                                                                                                                                                                                                                                                                                                                                                                                                                                                                                                                                                           |
|                               |                                                                                                                                                                                                                                                                                                                                                                                                                                                                                                                                                                                                                                                                                                                                                                                                                                                                                 |

SCHOLARONE™  
Manuscripts

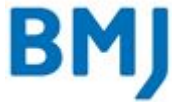

I, the Submitting Author has the right to grant and does grant on behalf of all authors of the Work (as defined in the below author licence), an exclusive licence and/or a non-exclusive licence for contributions from authors who are: i) UK Crown employees; ii) where BMJ has agreed a CC-BY licence shall apply, and/or iii) in accordance with the terms applicable for US Federal Government officers or employees acting as part of their official duties; on a worldwide, perpetual, irrevocable, royalty-free basis to BMJ Publishing Group Ltd ("BMJ") its licensees and where the relevant Journal is co-owned by BMJ to the co-owners of the Journal, to publish the Work in this journal and any other BMJ products and to exploit all rights, as set out in our [licence](#).

The Submitting Author accepts and understands that any supply made under these terms is made by BMJ to the Submitting Author unless you are acting as an employee on behalf of your employer or a postgraduate student of an affiliated institution which is paying any applicable article publishing charge ("APC") for Open Access articles. Where the Submitting Author wishes to make the Work available on an Open Access basis (and intends to pay the relevant APC), the terms of reuse of such Open Access shall be governed by a Creative Commons licence – details of these licences and which [Creative Commons](#) licence will apply to this Work are set out in our licence referred to above.

Other than as permitted in any relevant BMJ Author's Self Archiving Policies, I confirm this Work has not been accepted for publication elsewhere, is not being considered for publication elsewhere and does not duplicate material already published. I confirm all authors consent to publication of this Work and authorise the granting of this licence.

# Eye Injury epidemiology of workers by age, sex and occupation over the last 10 years in Spain

Martín-Prieto, S. Msc<sup>1</sup>, Alvarez-Peregrina, C. PhD<sup>1</sup>, Thuissard-Vasallo, I. Msc<sup>1</sup>, Catalina-Romero. C. PhD<sup>2</sup>,  
Calvo-Bonacho, E. PhD<sup>2</sup>, Villa-Collar, C. PhD<sup>1</sup>, Sanchez-Tena, MA. PhD<sup>1</sup>

<sup>1</sup>School of Biomedical and Health Sciences, Universidad Europea de Madrid, Madrid 28670, Spain

<sup>2</sup>Ibermutua (Mutua colaboradora con la seguridad social nº 274), Madrid, Spain

[martin.prieto.sergio@gmail.com](mailto:martin.prieto.sergio@gmail.com)

[crisrina.alvarez@universidadeuropea.es](mailto:crisrina.alvarez@universidadeuropea.es)

[israeljohn.thuissard@universidadeuropea.es](mailto:israeljohn.thuissard@universidadeuropea.es)

[Carloscatalina@ibermutua.es](mailto:Carloscatalina@ibermutua.es)

[EvaCalvo@ibermutua.es](mailto:EvaCalvo@ibermutua.es)

[cesar.villa@universidadeuropea.es](mailto:cesar.villa@universidadeuropea.es)

[miguelangel.sanchez@universidadeuropea.es](mailto:miguelangel.sanchez@universidadeuropea.es)

**ABSTRACT:**

*OBJECTIVE:* To describe the epidemiological characteristics of work-related eye injuries (WREI) in a mutual insurance company in Spain.

*DESIGN AND SETTINGS:* A descriptive, retrospective and longitudinal study based on data from workers insured by a labour insurance company in Spain from 1<sup>st</sup> January 2008 to 31<sup>st</sup> December 2018 was presented. The study considered the ratio of the number of WREI per 100000 population and the relative risk of suffering an ocular injury. The work-related eye injuries were characterised by sex, age and occupation.

*PRIMARY AND SECONDARY OUTCOME MEASURES:* Epidemiology of work-related eye injuries (WREI).

*PARTICIPANTS:* In Spain, all workers are insured by a labour insurance company that provides cover in the event of work-related accidents. In this study, we have included all workers insured by one such company, which has insured workers in all provinces of Spain over the study period.

*RESULTS:* The study included 50,265 WREI in the company over the 10-year period. Most of the injuries occurred in males (44,445; 88.4%), in the 35-44 age group (15,992; 31.8%), and in industry workers (18,899; 42.6%). The average incidence was 429.75/100,000 working population and 4,273.36/100,000 IBERMUTUA accidents. The incidence of WREI decreased over the study period in all variables. Males, 16-24 age group and industry occupation group have the highest relative risk (RR) and incidence for WREI.

*CONCLUSIONS:* Specific programs for ocular protection and changes in occupation over the 10-year study period were the most probable causes of the decrease in WREI incidence in our study.

***STRENGTHS AND LIMITATIONS OF THIS STUDY:***

- This study covers the largest area and the highest number of workers of those published in Europe to date.
- The long period of study indicates the results are not only due to specific changes in the insured company but rather to changes in Spanish workers.
- Because of characteristic statistical analysis in our study, it is very easy to check the relevance of sex, age and occupation with respect to WREI.



## METHODS

The research described herein adhered to the tenets of the Declaration of Helsinki and approved by ethic investigation committee of Universidad Europea de Madrid (CEI-UE). All medical records were anonymous; only statistical information was provided by IBERMUTUA for research purposes.

A descriptive, retrospective and longitudinal study was performed. We analysed WREI that affect any ocular structure during work time in a mutual insurance company. Study data were provided by IBERMUTUA. This company's medical specialists evaluate work accidents reported by the companies it insures, analysing the work-related injury and its consequences for insured workers. The study period was from 1<sup>st</sup> January 2008 to 31<sup>st</sup> December 2018.

The area of study covered all regions in Spain including Ceuta and Melilla, comprising an approximate area of 505,983 km<sup>2</sup> and a population of 46,650,300 in 2018 (8) (latest census). In these years, we analysed 11,696,259 subjects (table 1), all of them IBERMUTUA-insured workers during the study period, and we related them to 201,167,800 workers in Spain.

### INCLUSION CRITERIA

We studied WREI that affect any ocular structure during work time and *in itinere*. These injuries were evaluated and classified by medical specialists according to CIE-9-MC classification (correlations with ICD-9 where ocular injury is secondary to an accident involving other primary structures of the body).

We analysed sex (males and females), age and occupation. We established five age groups (16-24, 25-34, 35-44, 45-54, and  $\geq 55$ ) according to the Labour, Migrations and Social Security Ministry of Spain (3). Occupation was classified according to the same Ministry's 2009 National Economic Activities Code (CNAE-2009 in Spanish), whereby occupation was divided into four groups: Agricultura, Industry, Construction and Services (3).

### STATISTICAL ANALYSIS

Quantitative variables are given as a mean  $\pm$  standard deviation (SD). For qualitative variables, absolute and relative frequencies are given in percentages. To standardize data, the relationship between number of WREI and insured/accident per 100,000 population in IBERMUTUA (ratio/100,000 population) was

1  
2  
3 calculated. A relative risk (RR) was computed to check the effects that exist between different groups of  
4  
5 sex, age and occupation.  
6

7  
8 The chi-square test and the Fisher exact test was used to analyse qualitative variables. The student's T  
9  
10 test and the Mann-Whitney U Test were used, as appropriate, to search for significant differences  
11  
12 between preferences.  
13

14 The statistical analysis was performed using SPSS, v.21.0 (IBM Corp; Armonk, NY; USA), with  $p < 0.05$   
15  
16 considered significant for all analyses.  
17

## 18 **RESULTS**

19  
20  
21 There were 50,265 WREI in IBERMUTUA over the 10-year period (table 1). These accidents affected 0.45%  
22  
23 of all workers insured by IBERMUTUA and represented 4.22% of all accidents suffered by IBERMUTUA-  
24  
25 insured workers (1,179,067 total accidents (table 1)). The average age was  $38.62 \pm 10.57$  and the majority  
26  
27 of all injuries occurred in 35-44 age group (15,992; 32.0%). Within the subject population, 44,445 were  
28  
29 male (89.3%) and 5,349 female (10.7%), and industry workers were the most affected group (18,899,  
30  
31 42.6%) (Table 1).  
32

33  
34 The incidence of WREI was 429.75/100,000 IBERMUTUA-insured workers and the incidence of WREI  
35  
36 among IBERMUTUA-insured accidents was 4,273.36/100,000.  
37

38  
39 Workers insured by IBERMUTUA constituted an average of 5.81% (SD  $\pm 0.221$ ) of all workers in Spain, and  
40  
41 the rate of change between workers insured in IBERMUTUA and total workers in Spain in the study period  
42  
43 did not show statistically significant differences ( $p = 0.9987$ ) (Figure 1).  
44

### 45 *INCIDENCE AND RELATIVE RISK (RR) PER 100,000 IBERMUTUA INSURED*

46  
47 The incidence of WREI over 10-year period was 680.12 for males and 103.63 for females. Therefore, males  
48  
49 had 6.56 (95% CI 6.38-6.75) times more risk of suffering WREI than females (Table 2). If we analyse the  
50  
51 evolution over the period, there was a decrease in incidence in both groups which was statistically  
52  
53 significantly bigger in males than females ( $p = 0.00027$ ) (Figure 2a).  
54

55  
56 Highest incidence by age group corresponds to the 16-24 group (561.16). Incidence decreases with age.  
57  
58 487.27 in 25-34, 435.57 in 35-44, 369.42 in 45-54, and 316.69 in  $\geq 55$  group (Table 2). The  $\geq 55$  age group  
59  
60



1  
2  
3 is the reference for calculating the RR of suffering a WREI in the other groups because it is the group with  
4 the lowest incidence. In this case, RR decreases with age in the same way as the incidence (1.77 (95% CI  
5 1.71-1.83), 1.54 (95% CI 1.51-1.57), 1.38 (95% CI 1.35-1.41), and 1.17 (95% CI 1.13-1.21)) (Table 2). Over  
6  
7  
8 the study period, a decrease in the incidence of WREI in all age groups was observed, and it was  
9 statistically significant ( $p < 0.05$ ) when we compared 16-24 age group with the other groups, as well as  
10 when we compared 25-34 age group with 45-54 age group ( $p = 0.035$ ), and 25-34 age group with  $\geq 55$  age  
11 group ( $p = 0.021$ ) (Figure 2b).

12  
13  
14  
15  
16  
17  
18 Industry workers were the occupation group with the highest incidence of WREI (1538.17), followed by  
19  
20  
21  
22  
23  
24  
25  
26  
27  
28  
29  
30  
31  
32  
33  
34  
35  
36  
37  
38  
39  
40  
41  
42  
43  
44  
45  
46  
47  
48  
49  
50  
51  
52  
53  
54  
55  
56  
57  
58  
59  
60  
Construction workers (1381.52), Agriculture workers (479.65) and, finally, Services workers (198.92)  
(Table 2). Therefore, in comparison with Services workers, the risk of suffering an accident (RR) is 7.73  
(95% CI 7.55-7.92) times higher in Industry workers, 6.94 (95% CI 6.77-7.12) times higher in Construction  
workers, and 1.53 (95% CI 1.45-1.61) times higher in Agriculture workers (Table 2). A decrease in incidence  
was observed in all occupation groups over the period. There were statistically significant differences  
( $p < 0.05$ ) when we compared all groups with each other, except for the two groups with the highest  
incidence, Industry workers and Construction workers ( $p = 0.827$ ) (Figure 2c).

#### *INCIDENCE AND RELATIVE RISK (RR) PER 100,000 IBERMUTUA ACCIDENTS*

37  
38  
39  
40  
41  
42  
43  
44  
45  
46  
47  
48  
49  
50  
51  
52  
53  
54  
55  
56  
57  
58  
59  
60  
WREI incidence was 5125.26 for males and 1762.18 for females, with a RR 2.91 (95% CI 2.83-299) higher  
in males (table 2). Incidence throughout the period decreases over time and is statistically significant  
higher in males ( $p < 0.001$ ) than females (Figure 3a).

137  
138  
139  
140  
141  
142  
143  
144  
145  
146  
147  
148  
149  
150  
151  
152  
153  
154  
155  
156  
157  
158  
159  
160  
In the same way as when we compared the incidence per 100,000 IBERMUTUA insured, incidence and RR  
decrease with age. We observed the highest incidence and RR in 16-24 age group (5083.64 and RR 1.51  
(95% CI 1.46-1.56)), followed by 25-34 age group (4800.23 and RR 1.43 (95% CI 1.40-1.46)), 35-44 age  
group (4364.93 and RR 1.30 (95% CI 1.27-1.33)), 45-54 years group (3729.39 y RR 1.11 (95% CI 1.07-1.15)),  
and, used as reference and with the lowest incidence of all, the  $\geq 55$  age group (3368.01). WREI incidence  
decreased in all age groups over time, and there was a statistically significant ( $p < 0.05$ ) decrease when we  
compared 16-24 and 25-34 age groups with each other and both groups with the other groups (Figure  
3b).

1  
2  
3 Industry workers suffer the highest incidence and RR of WREI in the four occupation groups (8050.69; RR  
4 3.83 (95% CI 3.74-3.92)), followed by Construction workers (6650; RR 2.54 (95% CI 2.48-5.60)), Agriculture  
5 workers (4495.75; RR 1.72 (95% CI 1.64-1.81)), and, with the lowest incidence and RR of all, Services  
6 workers (2615.64), the latter therefore being reference group for RR. Although we observed a decrease  
7 in incidence over the period, it was not statistically significant when we compared different groups (Figure  
8 3c).

## 15 DISCUSSION

16  
17  
18 Of all the long-term studies we have observed in Europe, this is the one which covers the largest area and  
19 the highest number of cases. The close relationship between IBERMUTUA-insured workers and the  
20 evolution in number of workers in Spain ( $p=0.9987$ ) indicates the importance of our data analysis.

21  
22  
23 The percentage of WREI in our study was lower than Gomez Villa et al. observed in two villages on the  
24 island of Mallorca (Spain) (0.84%). The difference was maybe due to the smaller area and population (only  
25 two villages and 50,851 workers) and the shorter study period (two years).

26  
27  
28 The total incidence of WREI falls between the values of other studies (4,5) and is very similar to that found  
29 by Karlsen et al. in Wisconsin (USA) in 1986 (423/100,000) (10). However, in all of these studies, the  
30 incidence does not relate exclusively to work-related injuries. If we compare only with WREI, in our study  
31 we observe higher incidence than in Hong Kong (around 125/100,000) (11). However, it is very difficult to  
32 compare these two values because the Hong Kong study covered a period of only 3 months.

33  
34  
35 The higher impact in males is similar to other studies where the percentage of eye injuries in males was  
36 between 87 and 95.1% (5,12–14). A very similar RR was observed in Modena (Italy) (7:1 male/female  
37 ratio) (5), although it was lower in Taiwan (3.99) (12). This higher impact in males might be due to the  
38 different occupations in each group. In the last quarter of 2018 in Spain, there were 2.8 times more men  
39 than women working in Industry and 10.6 times more in Construction. These are the two workers  
40 occupations where the highest WREI incidence was observed in our study. However, there were 1.054  
41 million more female workers in Services (15).

42  
43  
44 35-44 was the most affected age group in our study. Our data match those found in an area in the  
45 southwest of China (14). The highest percentage observed in other studies was in 25-34 age group in  
46  
47  
48  
49  
50  
51  
52  
53  
54  
55  
56  
57  
58  
59  
60

1  
2  
3 Western Turkey (13) and in 16-24 age group in Modena (Italy) (5). However, we observed more incidence  
4  
5 of WREI for 100,000 insured in the lowest age group (16-24) in our study, and this incidence decreases  
6  
7 with age. We only analysed workers population, and we think this is why we found more eye injuries in  
8  
9 the lowest age group. These workers have less experience and perform more manual jobs.

10  
11 As in other studies (5), we observed the highest incidence and percentage of WREI in Industry workers.  
12  
13 Agriculture was the most affected group in other studies (16,17) but in all of them, Services was the least  
14  
15 affected group. This is due to the lower risk of trauma or other external agents that can affect Services  
16  
17 workers.

18  
19  
20 When we analysed the evolution of WREI for 100,000 IBERMUTUA insured/accidents, we standardized  
21  
22 data and eliminated WREI due to population variation. Therefore, we need to find reasons for the  
23  
24 reduction in WREI in all study variables. This generalized decrease is probably due to the implementation  
25  
26 of specific eye protection plans by the companies and IBERMUTUA. Variation in occupation over the study  
27  
28 period could be another reason, namely:

- 29  
30  
31 - Decrease in incidence is statistically significantly higher in males than females because in Spain a  
32  
33 decrease in Industry and Construction workers was observed (18).  
34  
35 - The statistically significant decrease in 16-24 and 25-34 age groups could be due to the  
36  
37 decreasing number of Spanish workers in these two occupation groups.  
38

39  
40 There are no studies that compare WREI for accidents only (as opposed to total population). We  
41  
42 considered it worth making this comparison in order to find out the mechanism and the importance that  
43  
44 WREI have in total accidents in Spain. Using this data could make it easier to devise specific programs  
45  
46 aimed at reducing ocular accidents and the associated costs.

47  
48 As we do not have the same number of cases in all variables (Table 1), this becomes a limitation of our  
49  
50 study and should be taken into account in future research in this area.  
51

## 52 **CONCLUSIONS**

53  
54 Specific knowledge of the incidence and relative risk of work-related eye injuries could be essential for  
55  
56 designing programs to prevent accidents in the workplace. This study contains the highest number of  
57  
58 cases of any published in Europe to date, so the results are significant.  
59  
60

## BIBLIOGRAPHY

1. Eurostat. Statistics Explained - Accidents at work statistics [Internet]. Eurostat Statistics Explained. 2015 [cited 2019 Oct 1]. p. 1–17. Available from: [https://ec.europa.eu/eurostat/statistics-explained/index.php/Accidents\\_at\\_work\\_statistics](https://ec.europa.eu/eurostat/statistics-explained/index.php/Accidents_at_work_statistics)
2. Eurostat. Health and safety at work in Europe (1999–2007) [Internet]. 2010. 96 p. Available from: <http://ec.europa.eu/eurostat/documents/3217494/5718905/KS-31-09-290-EN.PDF/88eef9f7-c229-40de-b1cd-43126bc4a946>
3. Ministerio de Empleo y Seguridad Social. Estadística de accidentes de trabajo 2017 [Internet]. 2018 [cited 2019 Oct 1]. p. 9–335. Available from: [http://www.mitramiss.gob.es/estadisticas/eat/eat17/ATR\\_2017\\_Completa.pdf](http://www.mitramiss.gob.es/estadisticas/eat/eat17/ATR_2017_Completa.pdf)
4. Sahraravand A, Haavisto A-K, Holopainen JM, Leivo T. Ocular traumas in working age adults in Finland - Helsinki Ocular Trauma Study. *Acta Ophthalmol*. 2017 May;95(3):288–94.
5. Gobba F, Dall'Olio E, Modenese A, De Maria M, Campi L, Cavallini G. Work-Related Eye Injuries: A Relevant Health Problem. Main Epidemiological Data from a Highly-Industrialized Area of Northern Italy. *Int J Environ Res Public Health*. 2017 Jun 6;14(6):604.
6. León Hernández FA, Taboada Esteve JF, Guimerá V, Gálvez-Martínez J, Pérez Salvador JL, Gil A, et al. Primer año del estudio multicéntrico español sobre traumatismos oculares. Vol. 60, *Archivos de la Sociedad Española de Oftalmología*. 1991. p. 79–88.
7. OMS. Salud ocular universal : un plan de acción mundial para 2014-2019. In: *Organizacion Mundial de la Salud*. 2013. p. 1–25.
8. Instituto Nacional de estadística (INE). España en cifras 2019 [Internet]. Publicaciones oficiales BOE. 2019 [cited 2019 Jul 30]. p. 1–60. Available from: [http://www.ine.es/prodyser/espa\\_cifras/2019/2/index.html](http://www.ine.es/prodyser/espa_cifras/2019/2/index.html)
9. Ministerio de Sanidad Consumo y Bienestar Social. eCIE9MC [Internet]. Edición electrónica de la CIE-9-MC. 9ª Edición. 2014 [cited 2019 Jul 30]. Available from: [https://eciemaps.mscbs.gob.es/ecieMaps/browser/index\\_9\\_mc.html#search=&flags=111100&flagsLT=11111111&searchId=1564475344573&indiceAlfabetico=&listaTabular=id-11528-class-360-379&expand=0&clasificacion=cie9mc&version=2014](https://eciemaps.mscbs.gob.es/ecieMaps/browser/index_9_mc.html#search=&flags=111100&flagsLT=11111111&searchId=1564475344573&indiceAlfabetico=&listaTabular=id-11528-class-360-379&expand=0&clasificacion=cie9mc&version=2014)
10. Karlson TA, Klein BEK. The Incidence of Acute Hospital-Treated Eye Injuries. *Arch Ophthalmol*. 1986 Oct 1;104(10):1473–6.
11. Yu TSI, Liu H, Hui K. A case-control study of eye injuries in the workplace in Hong Kong. *Ophthalmology*. 2004 Jan 1;111(1):70–4.
12. Ho C-K, Yen Y-L, Chang C-H, Chiang H-C, Shen Y-Y, Chang P-Y. Epidemiologic Study on Work-related Eye Injuries in Kaohsiung, Taiwan. *Kaohsiung J Med Sci* [Internet]. 2007 Sep;23(9):463–9. Available from: [http://doi.wiley.com/10.1016/S1607-551X\(08\)70054-8](http://doi.wiley.com/10.1016/S1607-551X(08)70054-8)
13. Serinken M, Turkcuier I, Cetin EN, Yilmaz A, Elicabuk H, Karcioğlu O. Causes and characteristics of work-related eye injuries in western Turkey. *Indian J Ophthalmol*. 2013 Sep;61(9):497–501.
14. Cai M, Zhang J. Epidemiological Characteristics of Work-Related Ocular Trauma in Southwest Region of China. *Int J Environ Res Public Health*. 2015 Aug 19;12(8):9864–75.
15. Instituto Nacional de estadística (INE). Encuesta de población Activa (EPA) 2018T4. [Internet]. Resultados Nacionales. Ocupados por grupo de edad, sexo y sector económico. 2018 [cited 2019 Mar 8]. Available from: <http://www.ine.es/jaxiT3/Tabla.htm?t=3959&L=0>
16. Jovanovic N, Peek-Asa C, Swanton A, Young T, Alajbegovic-Halimic J, Cavaljuga S, et al. Prevalence and risk factors associated with work-related eye injuries in Bosnia and Herzegovina. *Int J Occup Environ Health*. 2016 Oct 4;22(4):325–32.
17. Cruciani F, Lucchetta F, Regine F, Salandri AG, Abdolrahimzadeh B, Balacco Gabrieli C. Work-related accidents of ophthalmologic interest in Italy during 1986-1991. *Ophthalmologica*. 1997;211(4):251–5.
18. Instituto Nacional de estadística (INE). Encuesta de población activa (EPA). Activos por nacionalidad, sexo y sector económico 2008-2018 [Internet]. Encuesta de población Activa (EPA). Resultados nacionales. 2019 [cited 2019 Jul 30]. Available from: <http://www.ine.es/jaxiT3/Tabla.htm?t=3959&L=>

**CONTRIBUTORSHIP STATEMENT:**

Alvarez-Peregrina, Villa-Collar and Sanchez-Tena designed the study.

Catalina-Romero and Calvo-Bonacho obtained the data.

The obtained data was analysed by Martín-Prieto and Thuissard-Vasallo.

All authors contributed to the writing of the manuscript.

**COMPETING INTERESTS**

The authors declare that there are no conflicts of interest regarding the publication of this paper.

**FUNDING**

The authors received no financial support for the research, authorship, and/or publication of this article.

**DATA SHARING STATEMENT**

All data relevant to the study are included in the article or uploaded as supplementary information. Data are also available upon reasonable request.

**Table 1:** Total cases (N) of IBERMUTUA insured, IBERMUTUA accidents and total WREI (Work-related eye injuries) according to sex, age and workers occupation. Losses: total number of losses out of total number of cases (50265) of WREI in all different groups.

|                     | TOTAL       |      | LOSSES |      |
|---------------------|-------------|------|--------|------|
|                     | N           | %    | N      | %    |
| Ibermutua insured   | 11,696,259  |      |        |      |
| Ibermutua accidents | 1,17,9067   |      |        |      |
| Spanish workers     | 201,167,800 |      |        |      |
| WREI                | 50,265      |      |        |      |
| Sex WREI            |             |      |        |      |
| Male                | 44,445      | 89.3 |        |      |
| Female              | 5,349       | 10.7 |        |      |
| Total               | 49,794      | 100  | 471    | 0.9  |
| Age group WREI      |             |      |        |      |
| 16-24               | 4,388       | 8.8  |        |      |
| 25-34               | 14,981      | 29.9 |        |      |
| 35-44               | 15,992      | 32.0 |        |      |
| 45-54               | 10,278      | 20.5 |        |      |
| >55                 | 4,390       | 8.8  |        |      |
| Total               | 50,029      | 100  | 236    | 0.5  |
| Occupation WREI     |             |      |        |      |
| Agriculture         | 1,624       | 3.7  |        |      |
| Industry            | 18,899      | 42.6 |        |      |
| Construction        | 10,455      | 23.6 |        |      |
| Services            | 13,394      | 30.2 |        |      |
| Total               | 44,369      | 100  | 5,893  | 11.7 |

**Table 2:** Incidence of WREI over 100,000 IBERMUTUA insured/accidents and relative risk (RR) of WREI over the period study according to sex, age and workers occupation.

|                   | WREI incidence out of 100,000 IBERMUTUA insured | WREI incidence out of 100,000 IBERMUTUA accidents | RR WREI according to IBERMUTUA insured |           | RR WREI according to IBERMUTUA accidents |           |
|-------------------|-------------------------------------------------|---------------------------------------------------|----------------------------------------|-----------|------------------------------------------|-----------|
|                   |                                                 |                                                   | RR                                     | 95% CI    | RR                                       | 95% CI    |
| <b>Sex</b>        |                                                 |                                                   |                                        |           |                                          |           |
| Total             | 425,73                                          | 4253,29                                           |                                        |           |                                          |           |
| Male              | 680,13                                          | 5125,27                                           | 6,56                                   | 6,38-6,75 | 2,91                                     | 2,83-2,99 |
| Female            | 103,63                                          | 1762,19                                           | REF                                    |           | REF                                      |           |
| <b>Age</b>        |                                                 |                                                   |                                        |           |                                          |           |
| Total             | 427,74                                          | 4273,36                                           |                                        |           |                                          |           |
| 16-24 years       | 561,16                                          | 5083,65                                           | 1,77                                   | 1,71-1,83 | 1,51                                     | 1,46-1,56 |
| 25-34 years       | 487,27                                          | 4800,23                                           | 1,54                                   | 1,51-1,57 | 1,43                                     | 1,40-1,46 |
| 35-44 years       | 435,58                                          | 4364,94                                           | 1,38                                   | 1,35-1,41 | 1,30                                     | 1,27-1,33 |
| 45-54 years       | 369,43                                          | 3729,40                                           | 1,17                                   | 1,13-1,21 | 1,11                                     | 1,07-1,15 |
| >55 Years         | 316,69                                          | 3368,01                                           | REF                                    |           | REF                                      |           |
| <b>Occupation</b> |                                                 |                                                   |                                        |           |                                          |           |
| Total             | 479,65                                          | 4719,61                                           |                                        |           |                                          |           |
| Agriculture       | 305,14                                          | 4495,75                                           | 1,53                                   | 1,45-1,61 | 1,72                                     | 1,64-1,81 |
| Industry          | 1538,18                                         | 8050,69                                           | 7,73                                   | 7,55-7,92 | 3,83                                     | 3,74-3,92 |
| Construction      | 1381,53                                         | 6650,00                                           | 6,94                                   | 6,77-7,12 | 2,54                                     | 2,48-2,60 |
| Services          | 198,92                                          | 2615,65                                           | REF                                    |           | REF                                      |           |

#### Figure Legends:

**Figure 1:** Relation between IBERMUTUA insured (triangle line) and Spanish workers (circle line) over the study period. There were no statistically significant differences in evolution over the 2008-2018 period ( $p=0.9987$ ).

**Figure 2:** Evolution of WREI incidence per 100000 IBERMUTUA insured over the study period. A decrease in incidence according to sex (A), age (B) and occupation (C) was observed.

**Figure 3:** Evolution of WREI incidence per 100000 IBERMUTUA accidents over the study period. A decrease in incidence according to sex (A), age (B) and occupation (C) was observed.

### STROBE CHECKLIST

| STROBE CHECKLIST ITEM NUMBER | NUMBER OF PAGE ON MANUSCRIPT |
|------------------------------|------------------------------|
| Title and Abstract 1         | Page 1, 2                    |
| Background/rationale 2       | Page 3                       |
| Objectives 3                 | Page 3                       |
| Study design 4               | Page 4                       |
| Setting 5                    | Page 4                       |
| Participants 6               | Page 4                       |
| Variables 7                  | Page 4                       |
| Data sources/measurements 8  | Page 4                       |
| Bias 9                       | n/c                          |
| Study size 10                | Page 4                       |
| Quantitative variables 11    | Page 4                       |
| Statistical methods 12       | Page 5                       |
| Participants 13              | Page 5                       |
| Descriptive data 14          | Page 5                       |
| Outcome data 15              | n/c                          |
| Main results 16              | Page 5, 6 y 7                |
| Other analyses 17            | Page 5, 6 y 7                |
| Key results 18               | Page 7, 8                    |



1  
2  
3  
4  
5  
6  
7  
8  
9  
10  
11  
12  
13  
14  
15  
16  
17  
18  
19  
20  
21  
22  
23  
24  
25  
26  
27  
28  
29  
30  
31  
32  
33  
34  
35  
36  
37  
38  
39  
40  
41  
42  
43  
44  
45  
46  
47  
48  
49  
50  
51  
52  
53  
54  
55  
56  
57  
58  
59  
60

|                     |                   |
|---------------------|-------------------|
| Limitations 19      | <b>Page 8</b>     |
| Interpretation 20   | <b>Page 7 y 8</b> |
| Generalisability 21 | <b>Page 8</b>     |
| Funding 22          | <b>Page 10</b>    |

For peer review only

### BMJ Open

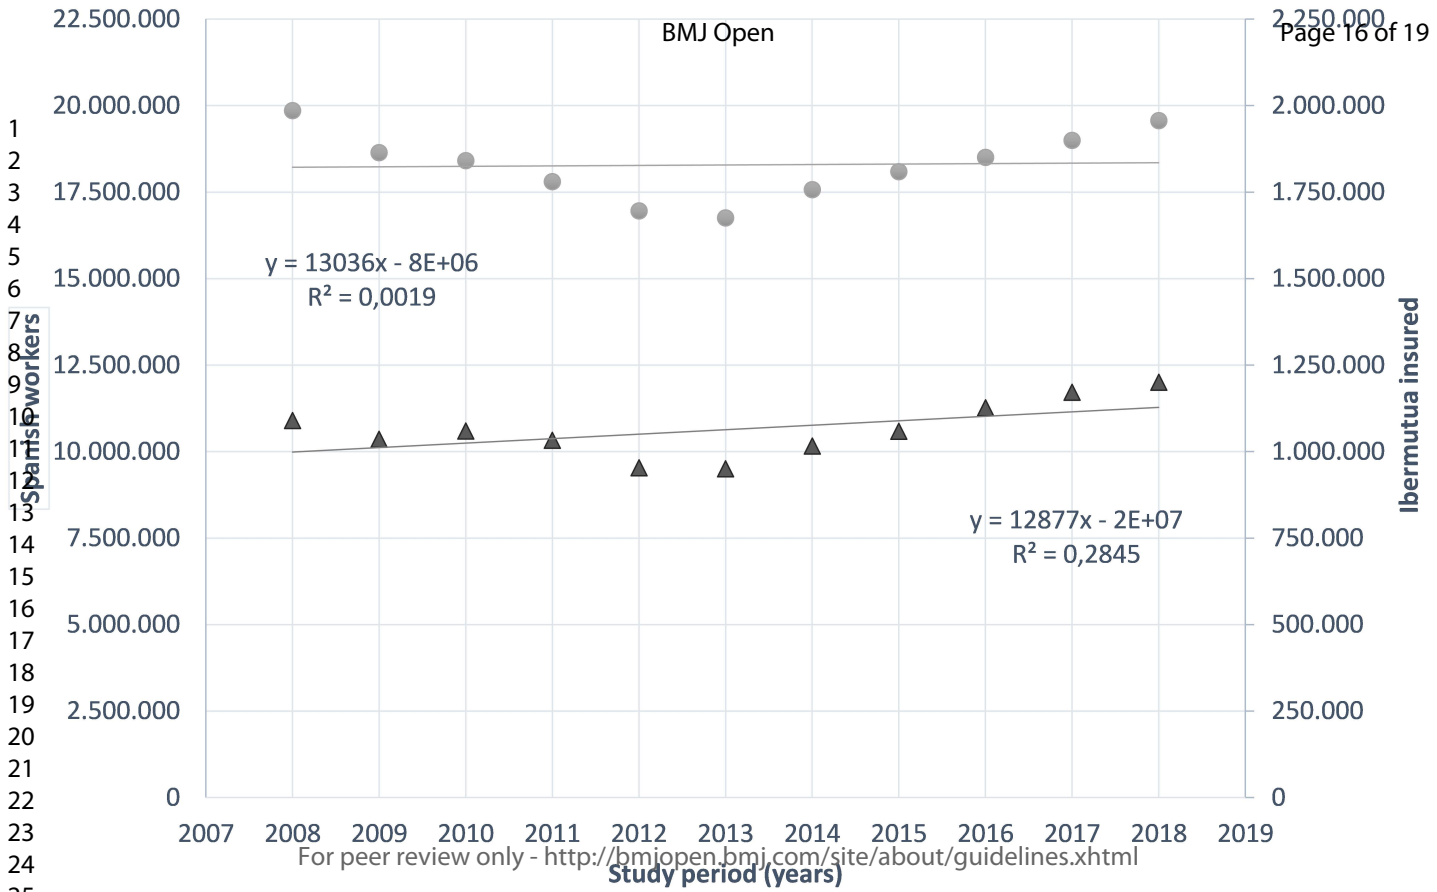

1  
2  
3  
4  
5  
6  
7  
8  
9  
10  
11  
12  
13  
14  
15  
16  
17  
18  
19  
20  
21  
22  
23  
24  
25  
26

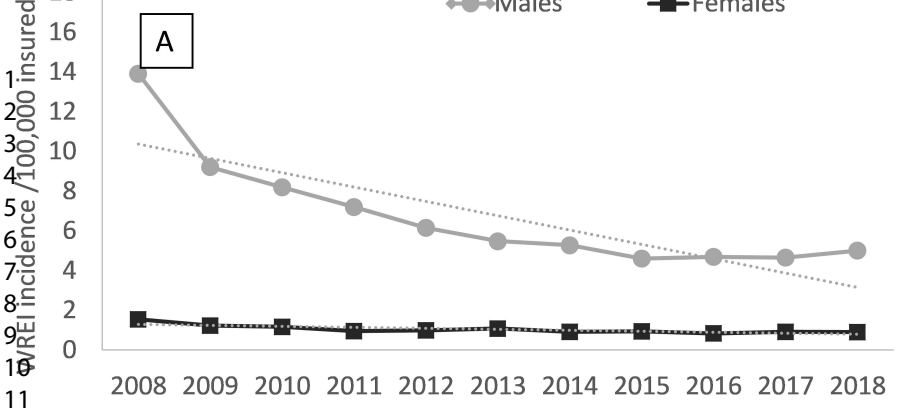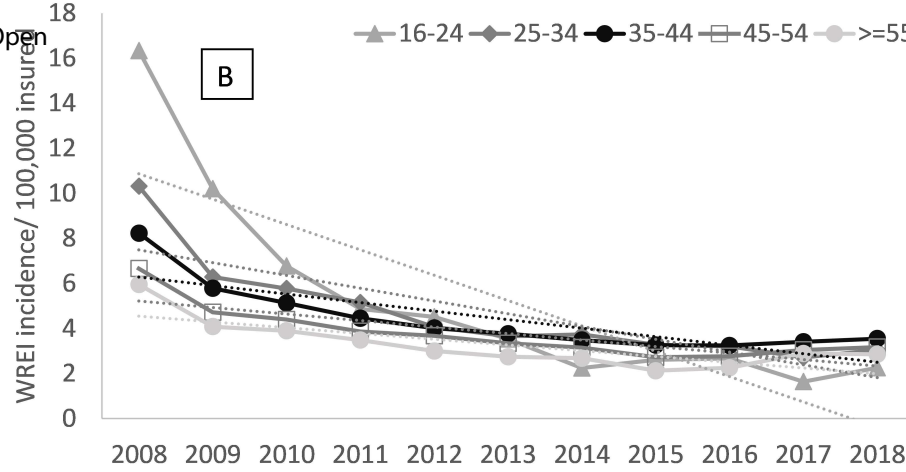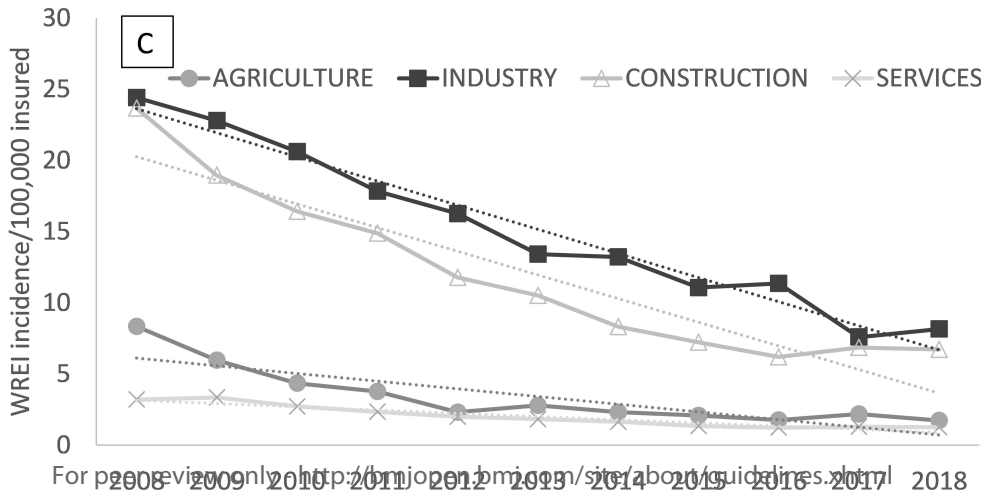

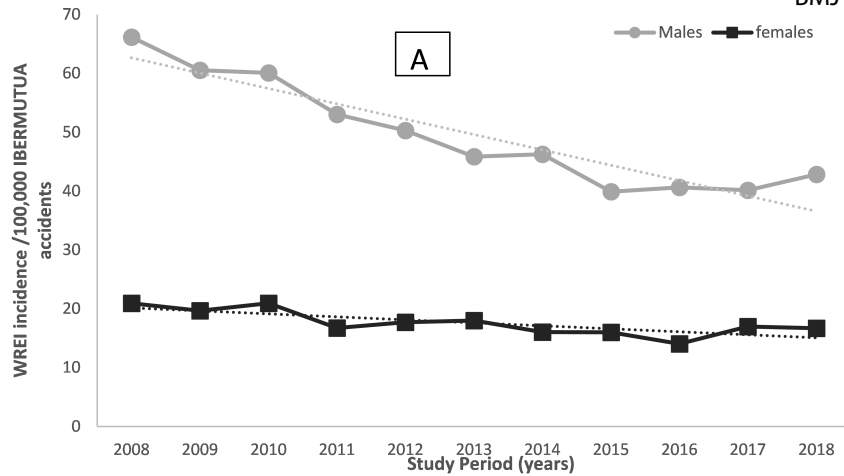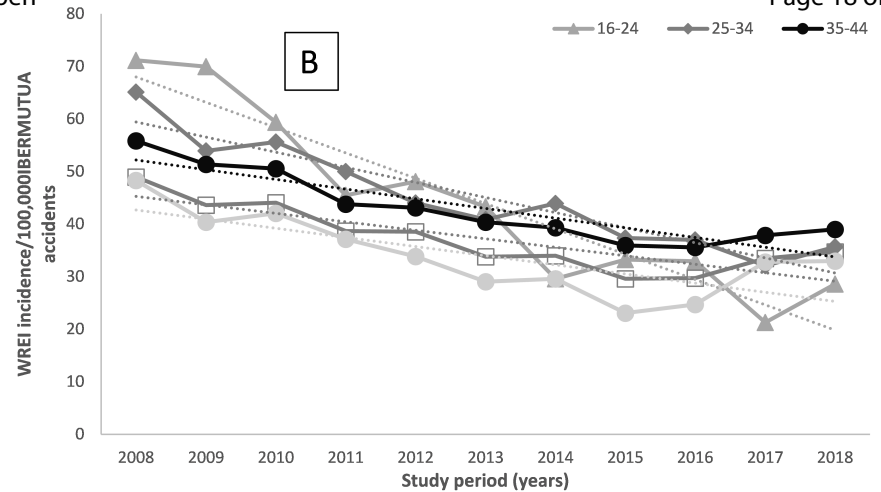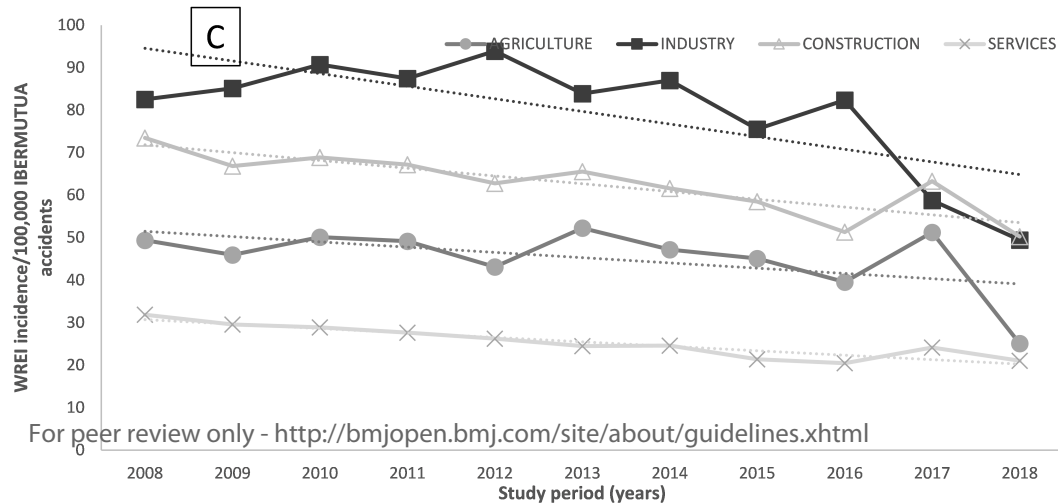

1  
2  
3  
4  
5  
6  
7  
8  
9  
10  
11  
12  
13  
14  
15  
16  
17  
18  
19  
20  
21  
22  
23  
24  
25  
26  
27  
28  
29  
30

## STROBE Statement—checklist of items that should be included in reports of observational studies

|                              | Item No | Recommendation                                                                                                                                                                                                                                                                                                                                                                                                                                                                                                                                                                                                                                                                                   |
|------------------------------|---------|--------------------------------------------------------------------------------------------------------------------------------------------------------------------------------------------------------------------------------------------------------------------------------------------------------------------------------------------------------------------------------------------------------------------------------------------------------------------------------------------------------------------------------------------------------------------------------------------------------------------------------------------------------------------------------------------------|
| <b>Title and abstract</b>    | 1       | (a) Indicate the study's design with a commonly used term in the title or the abstract<br>(b) Provide in the abstract an informative and balanced summary of what was done and what was found                                                                                                                                                                                                                                                                                                                                                                                                                                                                                                    |
| <b>Introduction</b>          |         |                                                                                                                                                                                                                                                                                                                                                                                                                                                                                                                                                                                                                                                                                                  |
| Background/rationale         | 2       | Explain the scientific background and rationale for the investigation being reported                                                                                                                                                                                                                                                                                                                                                                                                                                                                                                                                                                                                             |
| Objectives                   | 3       | State specific objectives, including any prespecified hypotheses                                                                                                                                                                                                                                                                                                                                                                                                                                                                                                                                                                                                                                 |
| <b>Methods</b>               |         |                                                                                                                                                                                                                                                                                                                                                                                                                                                                                                                                                                                                                                                                                                  |
| Study design                 | 4       | Present key elements of study design early in the paper                                                                                                                                                                                                                                                                                                                                                                                                                                                                                                                                                                                                                                          |
| Setting                      | 5       | Describe the setting, locations, and relevant dates, including periods of recruitment, exposure, follow-up, and data collection                                                                                                                                                                                                                                                                                                                                                                                                                                                                                                                                                                  |
| Participants                 | 6       | (a) <i>Cohort study</i> —Give the eligibility criteria, and the sources and methods of selection of participants. Describe methods of follow-up<br><i>Case-control study</i> —Give the eligibility criteria, and the sources and methods of case ascertainment and control selection. Give the rationale for the choice of cases and controls<br><i>Cross-sectional study</i> —Give the eligibility criteria, and the sources and methods of selection of participants<br>(b) <i>Cohort study</i> —For matched studies, give matching criteria and number of exposed and unexposed<br><i>Case-control study</i> —For matched studies, give matching criteria and the number of controls per case |
| Variables                    | 7       | Clearly define all outcomes, exposures, predictors, potential confounders, and effect modifiers. Give diagnostic criteria, if applicable                                                                                                                                                                                                                                                                                                                                                                                                                                                                                                                                                         |
| Data sources/<br>measurement | 8*      | For each variable of interest, give sources of data and details of methods of assessment (measurement). Describe comparability of assessment methods if there is more than one group                                                                                                                                                                                                                                                                                                                                                                                                                                                                                                             |
| Bias                         | 9       | Describe any efforts to address potential sources of bias                                                                                                                                                                                                                                                                                                                                                                                                                                                                                                                                                                                                                                        |
| Study size                   | 10      | Explain how the study size was arrived at                                                                                                                                                                                                                                                                                                                                                                                                                                                                                                                                                                                                                                                        |
| Quantitative variables       | 11      | Explain how quantitative variables were handled in the analyses. If applicable, describe which groupings were chosen and why                                                                                                                                                                                                                                                                                                                                                                                                                                                                                                                                                                     |
| Statistical methods          | 12      | (a) Describe all statistical methods, including those used to control for confounding<br>(b) Describe any methods used to examine subgroups and interactions<br>(c) Explain how missing data were addressed<br>(d) <i>Cohort study</i> —If applicable, explain how loss to follow-up was addressed<br><i>Case-control study</i> —If applicable, explain how matching of cases and controls was addressed<br><i>Cross-sectional study</i> —If applicable, describe analytical methods taking account of sampling strategy<br>(e) Describe any sensitivity analyses                                                                                                                                |

Continued on next page

**Results**

|                  |     |                                                                                                                                                                                                                                                                                                                                                                                                               |
|------------------|-----|---------------------------------------------------------------------------------------------------------------------------------------------------------------------------------------------------------------------------------------------------------------------------------------------------------------------------------------------------------------------------------------------------------------|
| Participants     | 13* | (a) Report numbers of individuals at each stage of study—eg numbers potentially eligible, examined for eligibility, confirmed eligible, included in the study, completing follow-up, and analysed<br>(b) Give reasons for non-participation at each stage<br>(c) Consider use of a flow diagram                                                                                                               |
| Descriptive data | 14* | (a) Give characteristics of study participants (eg demographic, clinical, social) and information on exposures and potential confounders<br>(b) Indicate number of participants with missing data for each variable of interest<br>(c) <i>Cohort study</i> —Summarise follow-up time (eg, average and total amount)                                                                                           |
| Outcome data     | 15* | <i>Cohort study</i> —Report numbers of outcome events or summary measures over time<br><i>Case-control study</i> —Report numbers in each exposure category, or summary measures of exposure<br><i>Cross-sectional study</i> —Report numbers of outcome events or summary measures                                                                                                                             |
| Main results     | 16  | (a) Give unadjusted estimates and, if applicable, confounder-adjusted estimates and their precision (eg, 95% confidence interval). Make clear which confounders were adjusted for and why they were included<br>(b) Report category boundaries when continuous variables were categorized<br>(c) If relevant, consider translating estimates of relative risk into absolute risk for a meaningful time period |
| Other analyses   | 17  | Report other analyses done—eg analyses of subgroups and interactions, and sensitivity analyses                                                                                                                                                                                                                                                                                                                |

**Discussion**

|                  |    |                                                                                                                                                                            |
|------------------|----|----------------------------------------------------------------------------------------------------------------------------------------------------------------------------|
| Key results      | 18 | Summarise key results with reference to study objectives                                                                                                                   |
| Limitations      | 19 | Discuss limitations of the study, taking into account sources of potential bias or imprecision. Discuss both direction and magnitude of any potential bias                 |
| Interpretation   | 20 | Give a cautious overall interpretation of results considering objectives, limitations, multiplicity of analyses, results from similar studies, and other relevant evidence |
| Generalisability | 21 | Discuss the generalisability (external validity) of the study results                                                                                                      |

**Other information**

|         |    |                                                                                                                                                               |
|---------|----|---------------------------------------------------------------------------------------------------------------------------------------------------------------|
| Funding | 22 | Give the source of funding and the role of the funders for the present study and, if applicable, for the original study on which the present article is based |
|---------|----|---------------------------------------------------------------------------------------------------------------------------------------------------------------|

\*Give information separately for cases and controls in case-control studies and, if applicable, for exposed and unexposed groups in cohort and cross-sectional studies.

**Note:** An Explanation and Elaboration article discusses each checklist item and gives methodological background and published examples of transparent reporting. The STROBE checklist is best used in conjunction with this article (freely available on the Web sites of PLoS Medicine at <http://www.plosmedicine.org/>, Annals of Internal Medicine at <http://www.annals.org/>, and Epidemiology at <http://www.epidem.com/>). Information on the STROBE Initiative is available at [www.strobe-statement.org](http://www.strobe-statement.org).

# BMJ Open

## Description of the epidemiological characteristics of work-related eye injuries in Spain. A retrospective study.

|                                 |                                                                                                                                                                                                                                                                                                                                                                                                                                                                                                                                                                                                                                                                                                                                                                                                                                                                                 |
|---------------------------------|---------------------------------------------------------------------------------------------------------------------------------------------------------------------------------------------------------------------------------------------------------------------------------------------------------------------------------------------------------------------------------------------------------------------------------------------------------------------------------------------------------------------------------------------------------------------------------------------------------------------------------------------------------------------------------------------------------------------------------------------------------------------------------------------------------------------------------------------------------------------------------|
| Journal:                        | <i>BMJ Open</i>                                                                                                                                                                                                                                                                                                                                                                                                                                                                                                                                                                                                                                                                                                                                                                                                                                                                 |
| Manuscript ID                   | bmjopen-2019-035696.R1                                                                                                                                                                                                                                                                                                                                                                                                                                                                                                                                                                                                                                                                                                                                                                                                                                                          |
| Article Type:                   | Original research                                                                                                                                                                                                                                                                                                                                                                                                                                                                                                                                                                                                                                                                                                                                                                                                                                                               |
| Date Submitted by the Author:   | 16-Mar-2020                                                                                                                                                                                                                                                                                                                                                                                                                                                                                                                                                                                                                                                                                                                                                                                                                                                                     |
| Complete List of Authors:       | Martin Prieto, Sergio; Universidad Europea de Madrid Campus de Villaviciosa de Odón, Biomedical and Health Science School<br>Álvarez Peregrina, Cristina; Universidad Europea de Madrid Campus de Villaviciosa de Odón, School of Biomedical and Health Sciences<br>Thuissard-Vasallo, Israel; Universidad Europea de Madrid Campus de Villaviciosa de Odón, Biomedical and Health Science School<br>Catalina Romero, Carlos; Ibermutua (Mutua de accidentes de trabajo y enfermedades profesionales nº 274)<br>Calvo Bonacho, Eva; Ibermutua (Mutua de accidentes de trabajo y enfermedades profesionales nº 274)<br>Villa Collar, César; Universidad Europea de Madrid Campus de Villaviciosa de Odón, Biomedical and Health Science School<br>Sánchez Tena, Miguel Ángel; Universidad Europea de Madrid Campus de Villaviciosa de Odón, Biomedical and Health Science School |
| <b>Primary Subject Heading</b>: | Occupational and environmental medicine                                                                                                                                                                                                                                                                                                                                                                                                                                                                                                                                                                                                                                                                                                                                                                                                                                         |
| Secondary Subject Heading:      | Ophthalmology, Epidemiology                                                                                                                                                                                                                                                                                                                                                                                                                                                                                                                                                                                                                                                                                                                                                                                                                                                     |
| Keywords:                       | ACCIDENT & EMERGENCY MEDICINE, EPIDEMIOLOGY, Health & safety < HEALTH SERVICES ADMINISTRATION & MANAGEMENT, OCCUPATIONAL & INDUSTRIAL MEDICINE, Medical ophthalmology < OPHTHALMOLOGY                                                                                                                                                                                                                                                                                                                                                                                                                                                                                                                                                                                                                                                                                           |
|                                 |                                                                                                                                                                                                                                                                                                                                                                                                                                                                                                                                                                                                                                                                                                                                                                                                                                                                                 |

SCHOLARONE™  
Manuscripts



I, the Submitting Author has the right to grant and does grant on behalf of all authors of the Work (as defined in the below author licence), an exclusive licence and/or a non-exclusive licence for contributions from authors who are: i) UK Crown employees; ii) where BMJ has agreed a CC-BY licence shall apply, and/or iii) in accordance with the terms applicable for US Federal Government officers or employees acting as part of their official duties; on a worldwide, perpetual, irrevocable, royalty-free basis to BMJ Publishing Group Ltd ("BMJ") its licensees and where the relevant Journal is co-owned by BMJ to the co-owners of the Journal, to publish the Work in this journal and any other BMJ products and to exploit all rights, as set out in our [licence](#).

The Submitting Author accepts and understands that any supply made under these terms is made by BMJ to the Submitting Author unless you are acting as an employee on behalf of your employer or a postgraduate student of an affiliated institution which is paying any applicable article publishing charge ("APC") for Open Access articles. Where the Submitting Author wishes to make the Work available on an Open Access basis (and intends to pay the relevant APC), the terms of reuse of such Open Access shall be governed by a Creative Commons licence – details of these licences and which [Creative Commons](#) licence will apply to this Work are set out in our licence referred to above.

Other than as permitted in any relevant BMJ Author's Self Archiving Policies, I confirm this Work has not been accepted for publication elsewhere, is not being considered for publication elsewhere and does not duplicate material already published. I confirm all authors consent to publication of this Work and authorise the granting of this licence.



1  
2  
3  
4  
5  
6  
7  
8  
9  
10  
11  
12  
13  
14  
15  
16  
17  
18  
19  
20  
21  
22  
23  
24  
25  
26  
27  
28  
29  
30  
31  
32  
33  
34  
35  
36  
37  
38  
39  
40  
41  
42  
43  
44  
45  
46  
47  
48  
49  
50  
51  
52  
53  
54  
55  
56  
57  
58  
59  
60

# Description of the epidemiological characteristics of work-related eye injuries in Spain. A retrospective study.

Martín-Prieto, S. Msc<sup>1</sup>, Alvarez-Peregrina, C. PhD<sup>1</sup>, Thuissard-Vasallo, I. Msc<sup>1</sup>, Catalina-Romero. C. PhD<sup>2</sup>, Calvo-Bonacho, E. PhD<sup>2</sup>, Villa-Collar, C. PhD<sup>1</sup>, Sanchez-Tena, MA. PhD<sup>1</sup>

<sup>1</sup> School of Biomedical and Health Sciences, Universidad Europea de Madrid, Madrid 28670, Spain

<sup>2</sup> Ibermutua (Mutua colaboradora con la seguridad social nº 274), Madrid, Spain

[martin.prieto.sergio@gmail.com](mailto:martin.prieto.sergio@gmail.com)

[cristina.alvarez@universidadeuropea.es](mailto:cristina.alvarez@universidadeuropea.es)

[israeljohn.thuissard@universidadeuropea.es](mailto:israeljohn.thuissard@universidadeuropea.es)

[Carloscatalina@lbermutua.es](mailto:Carloscatalina@lbermutua.es)

[EvaCalvo@lbermutua.es](mailto:EvaCalvo@lbermutua.es)

[villacollarc@gmail.com](mailto:villacollarc@gmail.com)

[miguelangel.sanchez@universidadeuropea.es](mailto:miguelangel.sanchez@universidadeuropea.es)

**ABSTRACT:**

**OBJECTIVE:** To describe the epidemiological characteristics and trends of work-related eye injuries (WREI) in Spain over a 10-years period by sex, age, and occupational sector.

**DESIGN AND SETTINGS:** A descriptive, retrospective and longitudinal study based on data from workers insured by a labour insurance company in Spain from 2008 to 2018 was presented. The study considered the ratio of the number of WREI per 100000 population and the relative risk of suffering an ocular injury. WREI were characterized by sex, age and occupational sector of injured workers.

**PRIMARY AND SECONDARY OUTCOME MEASURES:** Ratio of the number of WREI.

**PARTICIPANTS:** In Spain, all workers are insured by a labour insurance company that provides cover in the event of work-related accidents. In this study, we have included all workers insured by one of these insurance companies, IBERMUTUA, with workers in all areas of Spain.

**RESULTS:** The study included 50,265 WREI in the company over the 10-year period. Most of the injuries occurred in males (44,445; 88.4%), in 35-44 age group (15,992; 31.8%), and in industry workers (18,899; 42.6%). The average incidence was 429.75 per 100,000 workers insured and 4,273.36 per 100,000 IBERMUTUA accidents (related and not related to eyes). Males, 16-24 age group and industry occupational sector group have the highest incidence for WREI. The incidence of WREI decrease over the study period in all variables. Males have 6,56 (95% CI 6.38-6.75) times more risk of suffering WREI than females. 16-24 age group have 1.77 (95% CI 1.71-1.83) times more risk than in the group of workers older than 55. Finally, industry workers have 7.73 (95% CI 7.55-7.92) times more risk than services workers.

**CONCLUSIONS:** Specific knowledge and description of the incidence and relative risk of work-related eye injuries is the first step for designing programs to prevent accidents in the workplace.

**STRENGTHS AND LIMITATIONS OF THIS STUDY:**

- Data is collected from Ibermutua, one of the largest mutual insurance companies in Spain
- This study has the highest number of workers in a research across Europe.
- This study covers a 10 years period, including an economic crisis during the period studied.
- Data is collected from only one mutual insurance company

- 1  
2  
3 - Economic activities have been classified according to CNAE-2009 and not divided into specific  
4  
5 groups

6  
7 **FUNDING STATEMENT:** The authors received no financial support for the research, authorship, and/or  
8  
9 publication of this article.

10  
11 **COMPETING INTERESTS STATEMENT:** The authors declare that there are no conflicts of interest regarding  
12  
13 the publication of this paper.

14  
15 **WORD COUNT:** 2556 words.

## 16 17 18 **INTRODUCTION**

19  
20 An accident at work is defined in European Statistics on Accidents at Work (ESAW) methodology as a  
21  
22 discrete occurrence during the course of work which leads to physical or mental harm (1). According to  
23  
24 the Labour Force Survey (LFS), 6.9 million accidents at work occurred in the European Union in 2007,  
25  
26 affecting 3.2% of the population (2). In 2017, a total of 1.33 million of these accidents occurred in Spain,  
27  
28 affecting 2.86% of the population (3). Within these statistics, WREI caused 16,245 workers to be absent  
29  
30 from work in 2017 and the eye was the most affected structure in the head.

31  
32  
33 The prevalence of ocular injuries in developed countries ranges from 88 to 1,920 out of a 100,000  
34  
35 population (4,5), depending on the origin and the type of ocular injury. León Hernández et al. found that  
36  
37 20.2% of all ocular traumas in Spain in 1991 occurred in the workplace (6). The percentage of ocular  
38  
39 injuries related to work changes along with the world from 0.84 to 3.4% (7-9). It depends on the type of  
40  
41 population, the medical attention and the type of injury included in the study.

42  
43  
44 The universal plan of ocular health established by WHO for the period 2014-2019, has as a main goal  
45  
46 decreasing vision impairment around the world (7). One of their secondary objectives is the generation  
47  
48 of scientific data about the magnitude and causes of vision impairment in order to follow the progress  
49  
50 and could define priorities. WREI are one of these lesions related to vision impairment. Due to the  
51  
52 characteristics of these injuries, they could be prevented by the creation of specific plans that just could  
53  
54 be defined through the knowledge about the epidemiology and mechanism of WREI.

55  
56 The main objective of this study was the epidemiological characterization of WREI causing ocular injury in  
57  
58 Spain by sex, age and occupational sectors over a 10-years period.  
59  
60

## METHODS

A descriptive, retrospective and longitudinal study were performed. We analyzed WREI that affects any ocular structure during work time in a mutual insurance company. Study data were provided by IBERMUTUA, a mutual insurance company that collaborates with the Spanish Social Security system. Mutual insurance companies are non-profit private associations of business owners which are duly authorized by the Spanish Ministry of Employment and Social Security and registered with the Special Register operated by the said ministry. They aim to collaborate with the management of the Spanish Social Security system under its direction and auspices with members jointly assuming liability for the situations and with the scope established by the law. On these companies, medical specialists evaluate work accidents reported by the companies it insures, analyzing the work-related injury and its consequences for insured workers. The study period was from 1<sup>st</sup> January 2008 to 31<sup>st</sup> December 2018.

The area of study covered all regions in Spain including Ceuta and Melilla with a population of 46,650,300 in 2018 (7) (latest census). In these years, we analysed 11,696,259 subjects (table 1), all of them IBERMUTUA-insured workers during the study period, and we related them to 201,167,800 workers in Spain (8).

The research described herein adhered to the tenets of the Declaration of Helsinki and approved by the ethic investigation committee of Universidad Europea de Madrid (CEI-UE). All medical records were anonymous; only statistical information was provided by Ibermutua for research purposes.

## INCLUSION CRITERIA

We studied WREI that affects any ocular structure during work time and in itinere. These injuries were evaluated and classified by medical specialists according to CIE-9-MC classification, correlations with ICD-10 that's the new classification. According to WHO, ICD is the foundation for the identification of health trends and statistics globally, and the international standard for reporting diseases and health conditions. This allows making data comparisons in the same location across different periods. Ocular injuries are included in this classification with codes from 360 to 379. Only injuries where any ocular structure was affected as the main injury were included in the study.

1  
2  
3 We analysed sex (males and females), age and occupational sector. We established five age groups (16-  
4 24, 25-34, 35-44, 45-54, and  $\geq 55$ ) according to the Labour, Migrations and Social Security Ministry of  
5 Spain (3). The occupational sector was classified according to the same Ministry's 2009 National Economic  
6 Activities Code (CNAE-2009 in Spanish), whereby occupational sector was divided into four groups:  
7 Agricultura, Industry, Construction, and Services (3).  
8  
9

#### 10 11 12 13 14 STATISTICAL ANALYSIS

15  
16 Quantitative variables are given as a mean  $\pm$  standard deviation (SD). For qualitative variables, absolute  
17 and relative frequencies are given in percentages. To standardize data, the relationship between the  
18 number of WREI per 100,000 population in Ibermutua (ratio/100,000 population) was calculated.  
19

20  
21 Ibermutua data was divided into Ibermutua insured, which are the total number of workers insured by  
22 IBERMUTUA, and IBERMUTUA accidents. Accidents refer to all the workers insured by Ibermutua that  
23 have suffered an accident in the 10-year period studied. A relative risk (RR) was computed to check the  
24 effects that exist between different groups of sex, age, and occupational sector. To compare different  
25 groups in each variable, the lowest incidence per 100.000 population on each group was considered as  
26 reference. RR shows how many times more of risk have a worker to suffer an accident respect the  
27 reference.  
28  
29

30  
31 The chi-square test and the Fisher exact test was used to analyse qualitative variables. The student's T-  
32 test and the Mann-Whitney U-Test were used, as appropriate, to search for significant differences  
33 between preferences.  
34  
35

36  
37 The statistical analysis was performed using SPSS, v.21.0 (IBM Corp; Armonk, NY; USA), with  $p < 0.05$   
38 considered significant for all analyses.  
39  
40

#### 41 42 43 44 45 46 47 48 PATIENT AND PUBLIC INVOLVEMENT

49  
50 No patient involved.  
51

#### 52 53 54 55 56 57 58 59 60 **RESULTS**

There were 50,265 WREI in Ibermutua over the 10-year period (Table 1). These accidents affected 0.45%  
of all workers insured by IBERMUTUA and represented 4.22% of all accidents suffered by Ibermutua-  
insured workers (1,179,067 total accidents (Table 1)). The average age was  $38.62 \pm 10.57$  and the majority

1  
2  
3 of all injuries occurred in the 35-44 age group (15,992; 32.0%). Within the subject population, 44,445 were  
4 male (89.3%) and 5,349 females (10.7%), and industry workers were the most affected group (18,899,  
5 42.6%) (Table 1).  
6  
7  
8

9 The incidence of WREI was 429.75/100,000 Ibermutua-insured workers and the incidence of WREI among  
10 Ibermutua-insured accidents was 4,273.36/100,000.  
11  
12  
13

14 Workers insured by Ibermutua constituted an average of 5.81% (SD  $\pm$ 0.221) of all workers in Spain, and  
15 the rate of change between workers insured in Ibermutua and total workers in Spain in the study period  
16 did not show statistically significant differences ( $p=0.9987$ ) (Figure 1). This rate of change did not show  
17 statistically significant differences in services and industry. The decrease in Spanish construction workers  
18 was higher than Ibermutua construction insured over the study period, however, the trend is very  
19 similar. This trend was very different in Agriculture where Spanish workers decrease against Ibermutua  
20 insured who increased its number.  
21  
22  
23  
24  
25  
26  
27

#### 28 INCIDENCE AND RELATIVE RISK (RR) PER 100,000 IBERMUTUA INSURED

29  
30 The incidence of WREI over 10-year period was 680.12 for males and 103.63 for females. Therefore, males  
31 had 6.56 (95% CI 6.38-6.75) times more risk of suffering WREI than females (Table 2). If we analyse the  
32 evolution over the period, there was a decrease in incidence in both groups which was statistically  
33 significantly bigger in males than females ( $p=0.00027$ ) (Figure 2a).  
34  
35  
36  
37  
38  
39

40 The highest incidence by age group corresponds to the 16-24 group (561.16). The incidence decreases  
41 with age. 487.27 in 25-34, 435.57 in 35-44, 369.42 in 45-54, and 316.69 in  $\geq$  55 group (Table 2). The  $\geq$  55  
42 age group is the reference for calculating the RR of suffering a WREI in the other groups because it is the  
43 group with the lowest incidence. In this case, RR decreases with age in the same way as the incidence  
44 (1.77 (95% CI 1.71-1.83), 1.54 (95% CI 1.51-1.57), 1.38 (95% CI 1.35-1.41), and 1.17 (95% CI 1.13-1.21))  
45 (Table 2). Over the study period, a decrease in the incidence of WREI in all age groups was observed, and  
46 it was statistically significant ( $p<0.05$ ) when we compared 16-24 age group with the other groups, as well  
47 as when we compared 25-34 age group with 45-54 age group ( $p=0.035$ ), and 25-34 age group with  $\geq$  55  
48 age group ( $p=0.021$ ) (Figure 2b).  
49  
50  
51  
52  
53  
54  
55  
56  
57  
58  
59  
60

1  
2  
3 Industry workers were the occupation group with the highest incidence of WREI (1538.17), followed by  
4  
5 Construction workers (1381.52), Agriculture workers (479.65) and, finally, Services workers (198.92)  
6  
7 (Table 2). Therefore, in comparison with Services workers, the risk of suffering an accident (RR) is 7.73  
8  
9 (95% CI 7.55-7.92) times higher in Industry workers, 6.94 (95% CI 6.77-7.12) times higher in Construction  
10  
11 workers, and 1.53 (95% CI 1.45-1.61) times higher in Agriculture workers (Table 2). A decrease in incidence  
12  
13 was observed in all occupation groups over the period. There were statistically significant differences  
14  
15 ( $p < 0.05$ ) when we compared all groups with each other, except for the two groups with the highest  
16  
17 incidence, Industry workers and Construction workers ( $p = 0.827$ ) (Figure 2c).

#### INCIDENCE AND RELATIVE RISK (RR) PER 100,000 IBERMUTUA ACCIDENTS

21  
22 WREI incidence was 5125.26 for males and 1762.18 for females, with a RR 2.91 (95% CI 2.83-299) higher  
23  
24 in males (table 2). Incidence throughout the period decreases over time and is statistically significantly  
25  
26 higher in males ( $p < 0.001$ ) than females (Figure 3a).

27  
28  
29 In the same way as when we compared the incidence per 100,000 Ibermutua insured, incidence and RR  
30  
31 decrease with age. We observed the highest incidence and RR in 16-24 age group (5083.64 and RR 1.51  
32  
33 (95% CI 1.46-1.56)), followed by 25-34 age group (4800.23 and RR 1.43 (95% CI 1.40-1.46)), 35-44 age  
34  
35 group (4364.93 and RR 1.30 (95% CI 1.27-1.33)), 45-54 years group (3729.39 y RR 1.11 (95% CI 1.07-1.15)),  
36  
37 and, used as a reference and with the lowest incidence of all, the  $\geq 55$  age group (3368.01). WREI incidence  
38  
39 decreased in all age groups over time, and there was a statistically significant ( $p < 0.05$ ) decrease when we  
40  
41 compared 16-24 and 25-34 age groups with each other and both groups with the other groups (Figure  
42  
43 3b).

44  
45  
46 Industry workers suffer the highest incidence and RR of WREI in the four occupation groups (8050.69; RR  
47  
48 3.83 (95% CI 3.74-3.92)), followed by Construction workers (6650; RR 2.54 (95% CI 2.48-5.60)), Agriculture  
49  
50 workers (4495.75; RR 1.72 (95% CI 1.64-1.81)), and, with the lowest incidence and RR of all, Services  
51  
52 workers (2615.64), the latter therefore being reference group for RR. Although we observed a decrease  
53  
54 in incidence over the period, it was not statistically significant when we compared different groups (Figure  
55  
56 3c).

## DISCUSSION

Of all the long-term studies we have observed in Europe, this is the one which covers the largest area and the highest number of cases. The close relationship between Ibermutua-insured workers and the evolution in the number of workers in Spain ( $p=0.9987$ ) indicates the importance of our data analysis.

The percentage of WREI in our study was lower than Gomez Villa et al. observed in two villages on the island of Mallorca (Spain) (0.84%) (9), Torino (Italy) (1.3%) (10) and much lower than another with a similar number of study cases in the USA (3.4%) (11). The difference was maybe due to the smaller area and population (only two villages and 50,851 workers) and the shorter study period (two years) in Mallorca and the population in the USA and Torino is not only insured workers.

The total incidence of WREI falls between the values of other studies (4,5) and is very similar to that found by Karlsen et al. in Wisconsin (USA) in 1986 (423/100,000) (12). However, in all of these studies, the incidence does not relate exclusively to work-related injuries. If we compare only with WREI, in our study we observe higher incidence than in Hong Kong (around 125/100,000) (13). However, it is very difficult to compare these two values because the Hong Kong study covered a period of only 3 months.

The higher impact on males is similar to other studies where the percentage of eye injuries in males was between 87 and 95.1% (5,14–16). A very similar RR was observed in Modena (Italy) (7:1 male/female ratio) (5), although it was lower in Taiwan (3.99) (14). It is important to highlight that these studies included not only the active population, so results are Eye Injuries but not only related to work. This higher impact on males might be due to the different occupations in each group too. In the last quarter of 2018 in Spain, there were 2.8 times more men than women working in Industry and 10.6 times more in Construction. These are the two workers' occupational sectors where the highest WREI incidence was observed in our study. However, there were 1.054 million more female workers in Services (17).

35-44 was the most affected age group in our study. Our data match those found in an area in the southwest of China (16). The highest percentage observed in other studies was in the 25-34 age group in Western Turkey (15) and the 16-24 age group in Modena (Italy) (5). However, we observed more incidence



1  
2  
3 of WREI for 100,000 insured in the lowest age group (16-24) in our study, and this incidence decreases  
4  
5 with age. We only analysed workers population, and we think this is why we found more eye injuries in  
6  
7 the lowest age group. These workers have less experience and perform more manual jobs.

8  
9 As in other studies (5), we observed the highest incidence and percentage of WREI in Industry workers.  
10  
11 Agriculture was the most affected group in other studies (18,19) but in all of them, Services was the least  
12  
13 affected group. This is due to the lower risk of trauma or other external agents that can affect Services  
14  
15 workers.

16  
17  
18 When we analysed the evolution of WREI for 100,000 Ibermutua insured/accidents, we standardized data  
19  
20 and eliminated WREI due to population variation. Therefore, we need to find reasons for the reduction in  
21  
22 WREI in all study variables. This generalized decrease might be the result of unknown specific eye  
23  
24 protection plans proposed by the companies and Ibermutua. Variation in occupational sector incidence  
25  
26 over the study period could be another reason for this decrease. So, sectors with lower risk (agriculture  
27  
28 and services) have increased his proportion (81% in 2018 vs 73% in 2008) and this makes that incidence  
29  
30 of WREI also decrease in general.

31  
32  
33 There are no studies that compare WREI for accidents only (as opposed to total population). We  
34  
35 considered it worth making this comparison in order to find out the mechanism and the importance that  
36  
37 WREI have in total accidents in Spain. Using this data could make it easier to devise specific programs  
38  
39 aimed at reducing ocular accidents and the associated costs.

40  
41 Because of the higher number of data, a certain number of cases in the different variables was missing.  
42  
43 These missed cases were not relevant in the sex and age group but were important in occupational sector  
44  
45 groups (Table 1). This becomes a limitation of our study and should be taken into account in future  
46  
47 research in this area. Another limitation was the difficulty to compare with other studies where eye  
48  
49 injuries are not only related to work, as far as they are carried out in the hospital's emergency  
50  
51 departments.

## 52 53 54 **CONCLUSIONS**

55  
56 Specific and descriptive knowledge of the incidence and relative risk of work-related eye injuries is the  
57  
58 first step for designing programs to prevent accidents in the workplace.  
59  
60

1  
2  
3 There is a higher risk of WREI for workers from Industry and Construction when compare to Agriculture  
4 and Services. Experience is also an important factor for WREI, having younger workers more risk of  
5 suffering WREI.  
6  
7  
8  
9  
10  
11  
12  
13  
14  
15  
16  
17  
18  
19  
20  
21  
22  
23  
24  
25  
26  
27  
28  
29  
30  
31  
32  
33  
34  
35  
36  
37  
38  
39  
40  
41  
42  
43  
44  
45  
46  
47  
48  
49  
50  
51  
52  
53  
54  
55  
56  
57  
58  
59  
60

For peer review only

## BIBLIOGRAPHY

1. Eurostat. Statistics Explained - Accidents at work statistics [Internet]. Eurostat Statistics Explained. 2015 [cited 2019 Oct 1]. p. 1–7. Available from: <http://ec.europa.eu/eurostat/statistics-explained/>
2. Eurostat. Health and safety at work in Europe (1999–2007) - A statistical portrait [Internet]. Publications Office of the European Union. 2010. 96 p. Available from: <http://ec.europa.eu/eurostat/documents/3217494/5718905/KS-31-09-290-EN.PDF/88eef9f7-c229-40de-b1cd-43126bc4a946>
3. 1Dirección General de Estadística y Análisis Sociolaboral D. Resumen. Estadística de Accidentes de Trabajo 2017 [Internet]. Ministerio de empleo y seguridad Social. 2017 [cited 2019 Oct 1]. p. 9. Available from: [http://www.mitramiss.gob.es/estadisticas/eat/eat17/ATR\\_2017\\_Completa.pdf](http://www.mitramiss.gob.es/estadisticas/eat/eat17/ATR_2017_Completa.pdf)
4. Sahraravand A, Haavisto AK, Holopainen JM, Leivo T. Ocular traumas in working age adults in Finland – Helsinki Ocular Trauma Study. *Acta Ophthalmol*. 2017 May;95(3):288–94.
5. Gobba F, Dall’Olio E, Modenese A, De Maria M, Campi L, Cavallini GM. Work-related eye injuries: A relevant health problem. main epidemiological data from a highly-industrialized area of northern Italy. *Int J Environ Res Public Health*. 2017 Jun 6;14(6):604.
6. León Hernández FA, Taboada Esteve JF, Guimerá V, Gálvez-Martínez J, Pérez Salvador JL, Gil A, et al. Primer año del estudio multicéntrico español sobre traumatismos oculares. [Internet]. Vol. 60, *Archivos de la Sociedad Española de Oftalmología*. 1991 [cited 2019 Oct 2]. p. 79–88. Available from: <https://dialnet.unirioja.es/servlet/articulo?codigo=6768620>
7. Instituto Nacional de estadística (INE). España en cifras 2019 [Internet]. Publicaciones oficiales BOE. 2019 [cited 2019 Jul 30]. p. 1–60. Available from: [http://www.ine.es/prodyser/espa\\_cifras/2019/2/index.html](http://www.ine.es/prodyser/espa_cifras/2019/2/index.html)
8. Instituto Nacional de estadística (INE). Sección prensa / Encuesta de Población Activa (EPA). Serie histórica (Datos en miles de personas) [Internet]. 2014 [cited 2019 Dec 18]. Available from: [https://www.ine.es/prensa/epa\\_tabla.htm](https://www.ine.es/prensa/epa_tabla.htm)
9. Gómez Villa P, Ladaría Literas A. Patología oftálmica en el medio laboral: ergooftalmología [Internet]. 2007 [cited 2019 Dec 28]. p. 1–85. Available from: [http://diposit.ub.edu/dspace/bitstream/2445/7101/1/PATOLOGIA\\_OFTALMICA.pdf](http://diposit.ub.edu/dspace/bitstream/2445/7101/1/PATOLOGIA_OFTALMICA.pdf)
10. Fea A, Bosone A, Rolle T, Grignolo FM. Eye injuries in an Italian urban population: Report of 10620 cases admitted to an eye emergency department in Torino. *Graefes Arch Clin Exp Ophthalmol* [Internet]. 2008 Feb;246(2):175–9. Available from: <https://search.ebscohost.com/login.aspx?direct=true&db=mdc&AN=18183412&lang=es&site=host-live&scope=site>
11. Stagg BC, Shah MM, Talwar N, Padovani-Claudio DA, Woodward MA, Stein JD. Factors Affecting Visits to the Emergency Department for Urgent and Nonurgent Ocular Conditions. *Ophthalmology* [Internet]. 2017/01/31. 2017 May;124(5):720–9. Available from: <https://pubmed.ncbi.nlm.nih.gov/28159379>
12. Klein BEK. The Incidence of Acute Hospital-Treated Eye Injuries. *Arch Ophthalmol*. 1986 Oct 1;104(10):1473–6.
13. Yu TSI, Liu H, Hui K. A Case-Control Study of Eye Injuries in the Workplace in Hong Kong. *Ophthalmology*. 2004 Jan 1;111(1):70–4.
14. Ho CK, Yen YL, Chang CH, Chiang HC, Shen YY, Chang PY. Epidemiologic study on work-related eye injuries in Kaohsiung, Taiwan. *Kaohsiung J Med Sci* [Internet]. 2007 Sep;23(9):463–9. Available from: [http://doi.wiley.com/10.1016/S1607-551X\(08\)70054-8](http://doi.wiley.com/10.1016/S1607-551X(08)70054-8)
15. Serinken M, Turkcuer I, Cetin EN, Yilmaz A, Elicabuk H, Karcioglu O. Causes and characteristics of work-related eye injuries in western Turkey. *Indian J Ophthalmol*. 2013 Sep;61(9):497–501.
16. Cai M, Zhang J. Epidemiological characteristics of work-related ocular trauma in southwest region of China. *Int J Environ Res Public Health*. 2015 Aug 19;12(8):9864–75.
17. Instituto Nacional de estadística (INE). Encuesta de población Activa (EPA) 2018T4. [Internet]. Resultados Nacionales. Ocupados por grupo de edad, sexo y sector económico. 2018 [cited 2019 Mar 8]. Available from: <http://www.ine.es/jaxiT3/Tabla.htm?t=3959&L=0>
18. Jovanovic N, Peek-Asa C, Swanton A, Young T, Alajbegovic-Halimic J, Cavaljuga S, et al. Prevalence and risk factors associated with work-related eye injuries in Bosnia and Herzegovina. *Int J Occup Environ Health*. 2016 Oct 4;22(4):325–32.
19. Cruciani F, Lucchetta F, Regine F, Salandri Y, Abdolrahimzadeh B, Gabrieli B. Work-Related

1  
2  
3  
4  
5  
6  
7  
8  
9  
10  
11  
12  
13  
14  
15  
16  
17  
18  
19  
20  
21  
22  
23  
24  
25  
26  
27  
28  
29  
30  
31  
32  
33  
34  
35  
36  
37  
38  
39  
40  
41  
42  
43  
44  
45  
46  
47  
48  
49  
50  
51  
52  
53  
54  
55  
56  
57  
58  
59  
60

Accidents of Ophthalmologic Interest in Italy During 1986–1991. *Ophthalmologica*. 1997;211(4):251–5.

For peer review only

**CONTRIBUTORSHIP STATEMENT:**

Alvarez-Peregrina, Villa-Collar and Sanchez-Tena designed the study.

Catalina-Romero and Calvo-Bonacho obtained the data.

The obtained data was analysed by Martín-Prieto and Thuissard-Vasallo.

All authors contributed to the writing of the manuscript.

**COMPETING INTERESTS**

The authors declare that there are no conflicts of interest regarding the publication of this paper.

**FUNDING**

The authors received no financial support for the research, authorship, and/or publication of this article.

**DATA SHARING STATEMENT**

All data relevant to the study are included in the article or uploaded as supplementary information. Data are also available upon reasonable request.

**Table 1:** Total cases (N) of Ibermutua-insured, Ibermutua accidents and total WREI (Work-related eye injuries) according to sex, age and workers occupation. Losses: total number of losses out of total number of cases (50265) of WREI in all different groups.

|                     | TOTAL       |      | LOSSES |      |
|---------------------|-------------|------|--------|------|
|                     | N           | %    | N      | %    |
| Ibermutua insured   | 11,696,259  |      |        |      |
| Ibermutua accidents | 1,179,067   |      |        |      |
| Spanish workers     | 201,167,800 |      |        |      |
| WREI                | 50,265      |      |        |      |
| Sex WREI            |             |      |        |      |
| Male                | 44,445      | 89.3 |        |      |
| Female              | 5,349       | 10.7 |        |      |
| Total               | 49,794      | 100  | 471    | 0.9  |
| Age group WREI      |             |      |        |      |
| 16-24               | 4,388       | 8.8  |        |      |
| 25-34               | 14,981      | 29.9 |        |      |
| 35-44               | 15,992      | 32.0 |        |      |
| 45-54               | 10,278      | 20.5 |        |      |
| >55                 | 4,390       | 8.8  |        |      |
| Total               | 50,029      | 100  | 236    | 0.5  |
| Occupation WREI     |             |      |        |      |
| Agriculture         | 1,624       | 3.7  |        |      |
| Industry            | 18,899      | 42.6 |        |      |
| Construction        | 10,455      | 23.6 |        |      |
| Services            | 13,394      | 30.2 |        |      |
| Total               | 44,369      | 100  | 5,893  | 11.7 |

**Table 2:** Incidence of WREI over 100,000 insured and 1000,000 accidents and relative risk (RR) of WREI over a 10-year period according to sex, age and sector.

|               | WREI incidence per 100,000 insured | WREI incidence per 100,000 accidents | RR WREI according to insured |           | RR WREI according to accidents |           |
|---------------|------------------------------------|--------------------------------------|------------------------------|-----------|--------------------------------|-----------|
|               |                                    |                                      | RR                           | 95% CI    | RR                             | 95% CI    |
| <b>Sex</b>    |                                    |                                      |                              |           |                                |           |
| Total         | 425,73                             | 4253,29                              |                              |           |                                |           |
| Male          | 680,13                             | 5125,27                              | 6,56                         | 6,38-6,75 | 2,91                           | 2,83-2,99 |
| Female        | 103,63                             | 1762,19                              | REF                          |           | REF                            |           |
| <b>Age</b>    |                                    |                                      |                              |           |                                |           |
| Total         | 427,74                             | 4273,36                              |                              |           |                                |           |
| 16-24 years   | 561,16                             | 5083,65                              | 1,77                         | 1,71-1,83 | 1,51                           | 1,46-1,56 |
| 25-34 years   | 487,27                             | 4800,23                              | 1,54                         | 1,51-1,57 | 1,43                           | 1,40-1,46 |
| 35-44 years   | 435,58                             | 4364,94                              | 1,38                         | 1,35-1,41 | 1,30                           | 1,27-1,33 |
| 45-54 years   | 369,43                             | 3729,40                              | 1,17                         | 1,13-1,21 | 1,11                           | 1,07-1,15 |
| >55 Years     | 316,69                             | 3368,01                              | REF                          |           | REF                            |           |
| <b>Sector</b> |                                    |                                      |                              |           |                                |           |
| Total         | 479,65                             | 4719,61                              |                              |           |                                |           |
| Agriculture   | 305,14                             | 4495,75                              | 1,53                         | 1,45-1,61 | 1,72                           | 1,64-1,81 |
| Industry      | 1538,18                            | 8050,69                              | 7,73                         | 7,55-7,92 | 3,83                           | 3,74-3,92 |
| Construction  | 1381,53                            | 6650,00                              | 6,94                         | 6,77-7,12 | 2,54                           | 2,48-2,60 |
| Services      | 198,92                             | 2615,65                              | REF                          |           | REF                            |           |

Figure Legends:

**Figure 1:** Relation between Ibermutua insured (triangle line) and Spanish workers (circle line) over the study period. There were no statistically significant differences in evolution over the 2008-2018 period ( $p=0.9987$ ).

**Figure 2:** Evolution of WREI incidence per 100000 Ibermutua insured over the study period. A decrease in incidence according to sex (A), age (B) and occupation (C) was observed.

**Figure 3:** Evolution of WREI incidence per 100000 Ibermutua accidents over the study period. A decrease in incidence according to sex (A), age (B) and occupation (C) was observed.

#### STROBE CHEKLIST

| STROBE CHEKLIST ITEM NUMBER | NUMBER OF PAGE ON MANUSCRIPT |
|-----------------------------|------------------------------|
| Title and Abstract 1        | Page 1, 2                    |
| Background/rationale 2      | Page 3                       |
| Objectives 3                | Page 3                       |
| Study design 4              | Page 4                       |
| Setting 5                   | Page 4                       |
| Participants 6              | Page 4, 5                    |
| Variables 7                 | Page 4, 5                    |
| Data sources/measurements 8 | Page 4, 5                    |
| Bias 9                      | n/c                          |
| Study size 10               | Page 4                       |
| Quantitative variables 11   | Page 4                       |
| Statistical methods 12      | Page 5                       |
| Participants 13             | Page 4, 5                    |



|                     |                      |
|---------------------|----------------------|
| Descriptive data 14 | <b>Page 5, 6</b>     |
| Outcome data 15     | <b>n/c</b>           |
| Main results 16     | <b>Page 5, 6 y 7</b> |
| Other analyses 17   | <b>Page 5, 6 y 7</b> |
| Key results 18      | <b>Page 8, 9</b>     |
| Limitations 19      | <b>Page 9</b>        |
| Interpretation 20   | <b>Page 9, 10</b>    |
| Generalisability 21 | <b>Page 8, 9</b>     |
| Funding 22          | <b>Page 13</b>       |

### BMJ Open

1  
2  
3  
4  
5  
6  
7  
8  
9  
10  
11  
12  
13  
14  
15  
16  
17  
18  
19  
20  
21  
22  
23  
24  
25  
26

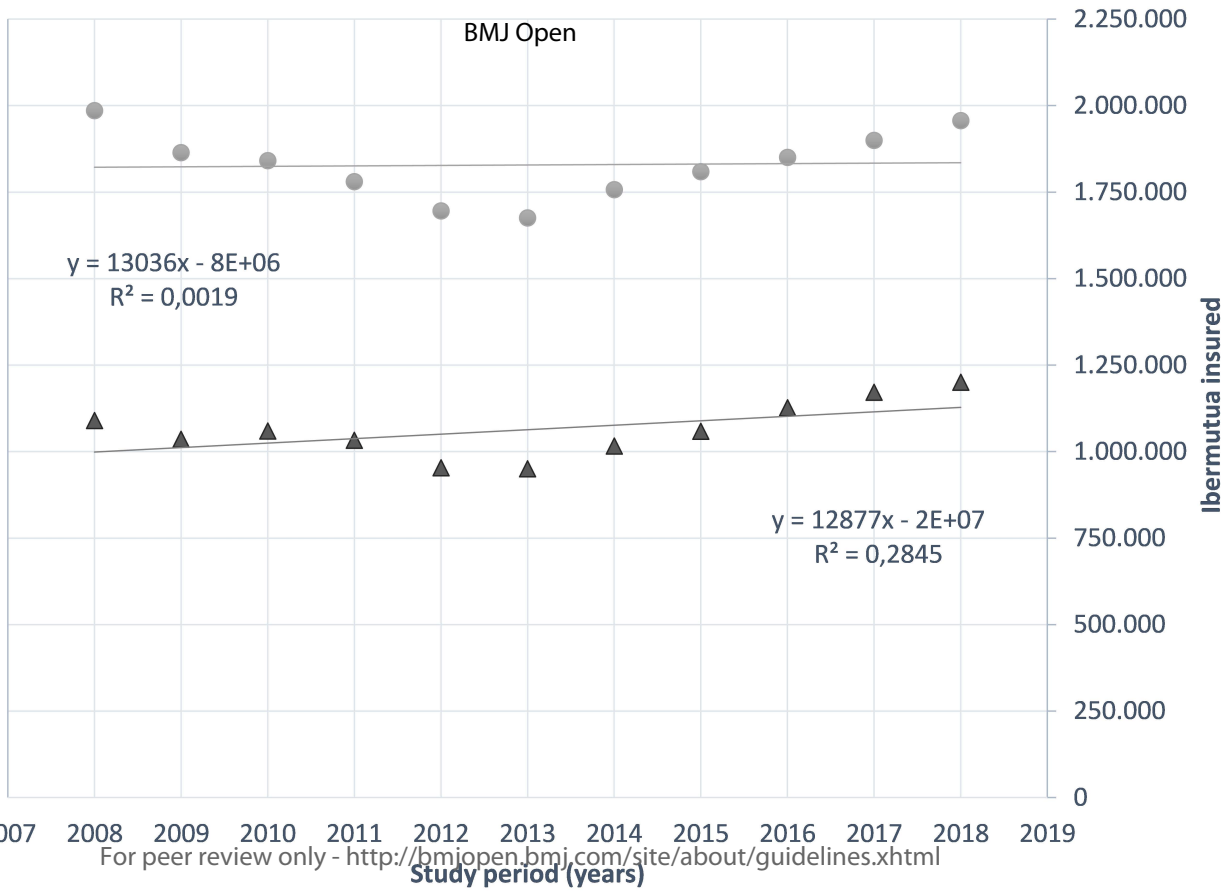

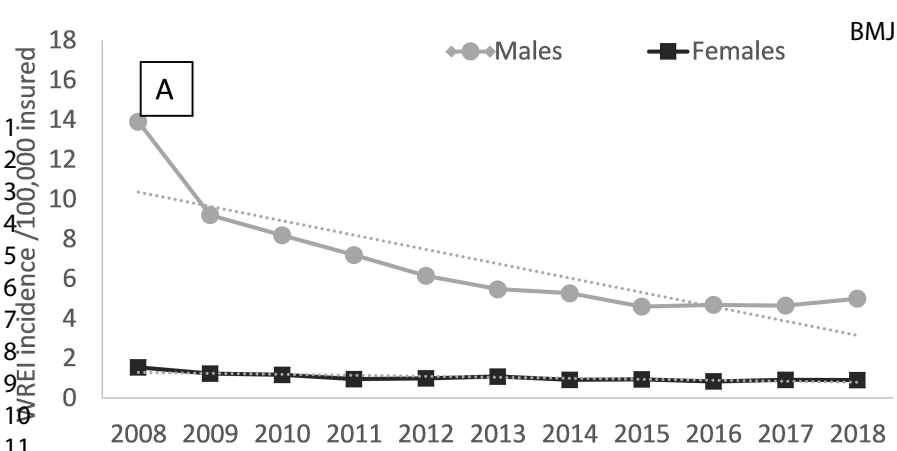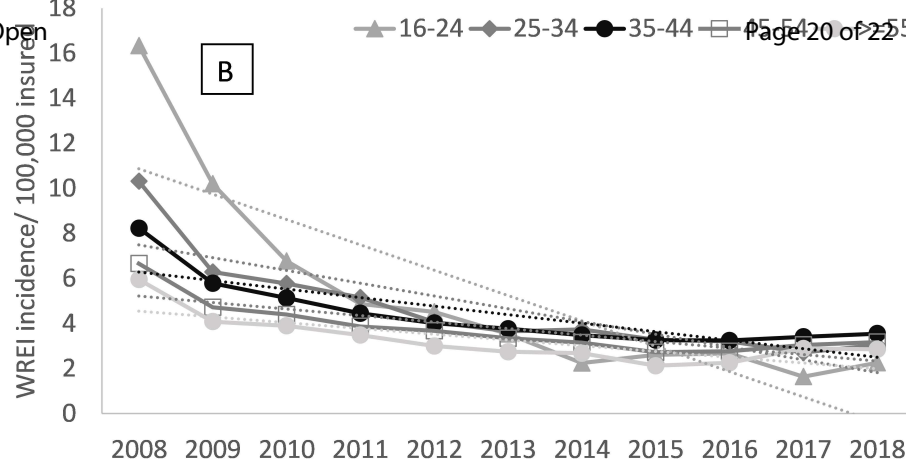

BMJ Open

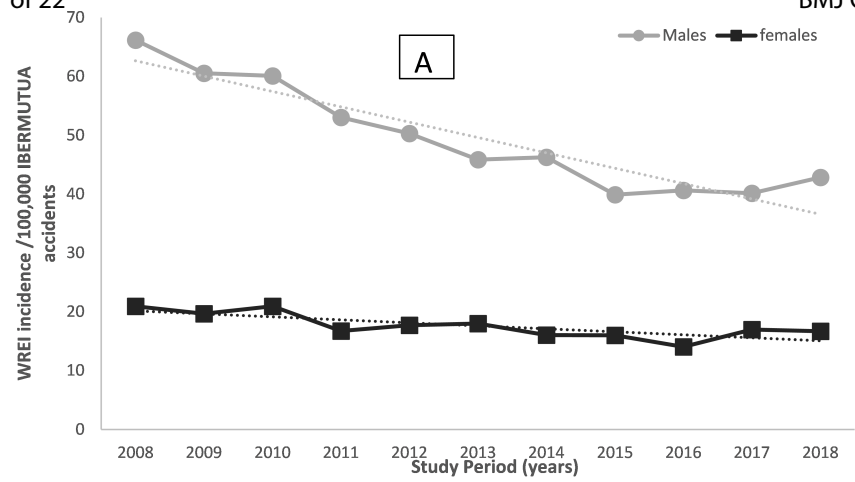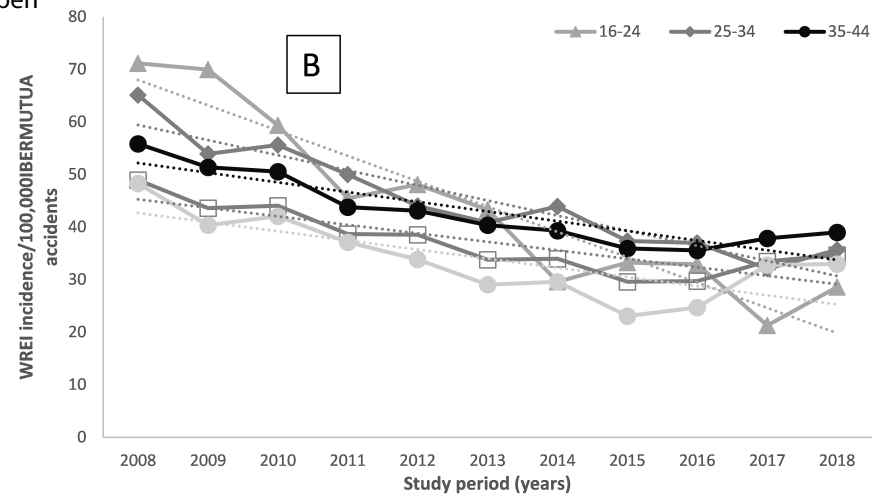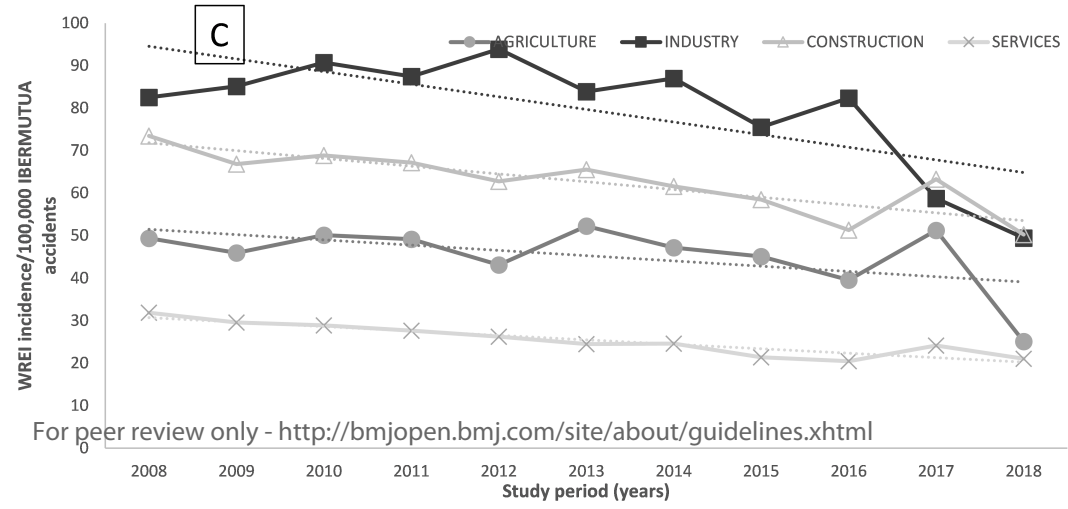

1  
2  
3  
4  
5  
6  
7  
8  
9  
10  
11  
12  
13  
14  
15  
16  
17  
18  
19  
20  
21  
22  
23  
24  
25  
26  
27  
28  
29  
30

## STROBE Statement—checklist of items that should be included in reports of observational studies

|                              | Item No | Recommendation                                                                                                                                                                                                                                                                                                                                                                                                                                                                                                                                                                                                                                                                                   |
|------------------------------|---------|--------------------------------------------------------------------------------------------------------------------------------------------------------------------------------------------------------------------------------------------------------------------------------------------------------------------------------------------------------------------------------------------------------------------------------------------------------------------------------------------------------------------------------------------------------------------------------------------------------------------------------------------------------------------------------------------------|
| <b>Title and abstract</b>    | 1       | (a) Indicate the study's design with a commonly used term in the title or the abstract<br>(b) Provide in the abstract an informative and balanced summary of what was done and what was found                                                                                                                                                                                                                                                                                                                                                                                                                                                                                                    |
| <b>Introduction</b>          |         |                                                                                                                                                                                                                                                                                                                                                                                                                                                                                                                                                                                                                                                                                                  |
| Background/rationale         | 2       | Explain the scientific background and rationale for the investigation being reported                                                                                                                                                                                                                                                                                                                                                                                                                                                                                                                                                                                                             |
| Objectives                   | 3       | State specific objectives, including any prespecified hypotheses                                                                                                                                                                                                                                                                                                                                                                                                                                                                                                                                                                                                                                 |
| <b>Methods</b>               |         |                                                                                                                                                                                                                                                                                                                                                                                                                                                                                                                                                                                                                                                                                                  |
| Study design                 | 4       | Present key elements of study design early in the paper                                                                                                                                                                                                                                                                                                                                                                                                                                                                                                                                                                                                                                          |
| Setting                      | 5       | Describe the setting, locations, and relevant dates, including periods of recruitment, exposure, follow-up, and data collection                                                                                                                                                                                                                                                                                                                                                                                                                                                                                                                                                                  |
| Participants                 | 6       | (a) <i>Cohort study</i> —Give the eligibility criteria, and the sources and methods of selection of participants. Describe methods of follow-up<br><i>Case-control study</i> —Give the eligibility criteria, and the sources and methods of case ascertainment and control selection. Give the rationale for the choice of cases and controls<br><i>Cross-sectional study</i> —Give the eligibility criteria, and the sources and methods of selection of participants<br>(b) <i>Cohort study</i> —For matched studies, give matching criteria and number of exposed and unexposed<br><i>Case-control study</i> —For matched studies, give matching criteria and the number of controls per case |
| Variables                    | 7       | Clearly define all outcomes, exposures, predictors, potential confounders, and effect modifiers. Give diagnostic criteria, if applicable                                                                                                                                                                                                                                                                                                                                                                                                                                                                                                                                                         |
| Data sources/<br>measurement | 8*      | For each variable of interest, give sources of data and details of methods of assessment (measurement). Describe comparability of assessment methods if there is more than one group                                                                                                                                                                                                                                                                                                                                                                                                                                                                                                             |
| Bias                         | 9       | Describe any efforts to address potential sources of bias                                                                                                                                                                                                                                                                                                                                                                                                                                                                                                                                                                                                                                        |
| Study size                   | 10      | Explain how the study size was arrived at                                                                                                                                                                                                                                                                                                                                                                                                                                                                                                                                                                                                                                                        |
| Quantitative variables       | 11      | Explain how quantitative variables were handled in the analyses. If applicable, describe which groupings were chosen and why                                                                                                                                                                                                                                                                                                                                                                                                                                                                                                                                                                     |
| Statistical methods          | 12      | (a) Describe all statistical methods, including those used to control for confounding<br>(b) Describe any methods used to examine subgroups and interactions<br>(c) Explain how missing data were addressed<br>(d) <i>Cohort study</i> —If applicable, explain how loss to follow-up was addressed<br><i>Case-control study</i> —If applicable, explain how matching of cases and controls was addressed<br><i>Cross-sectional study</i> —If applicable, describe analytical methods taking account of sampling strategy<br>(e) Describe any sensitivity analyses                                                                                                                                |

Continued on next page

1  
2  
3  
4  
5  
6  
7  
8  
9  
10  
11  
12  
13  
14  
15  
16  
17  
18  
19  
20  
21  
22  
23  
24  
25  
26  
27  
28  
29  
30  
31  
32  
33  
34  
35  
36  
37  
38  
39  
40  
41  
42  
43  
44  
45  
46  
47  
48  
49  
50  
51  
52  
53  
54  
55  
56  
57  
58  
59  
60**Results**

|                  |     |                                                                                                                                                                                                                                                                                                                                                                                                               |
|------------------|-----|---------------------------------------------------------------------------------------------------------------------------------------------------------------------------------------------------------------------------------------------------------------------------------------------------------------------------------------------------------------------------------------------------------------|
| Participants     | 13* | (a) Report numbers of individuals at each stage of study—eg numbers potentially eligible, examined for eligibility, confirmed eligible, included in the study, completing follow-up, and analysed<br>(b) Give reasons for non-participation at each stage<br>(c) Consider use of a flow diagram                                                                                                               |
| Descriptive data | 14* | (a) Give characteristics of study participants (eg demographic, clinical, social) and information on exposures and potential confounders<br>(b) Indicate number of participants with missing data for each variable of interest<br>(c) <i>Cohort study</i> —Summarise follow-up time (eg, average and total amount)                                                                                           |
| Outcome data     | 15* | <i>Cohort study</i> —Report numbers of outcome events or summary measures over time<br><i>Case-control study</i> —Report numbers in each exposure category, or summary measures of exposure<br><i>Cross-sectional study</i> —Report numbers of outcome events or summary measures                                                                                                                             |
| Main results     | 16  | (a) Give unadjusted estimates and, if applicable, confounder-adjusted estimates and their precision (eg, 95% confidence interval). Make clear which confounders were adjusted for and why they were included<br>(b) Report category boundaries when continuous variables were categorized<br>(c) If relevant, consider translating estimates of relative risk into absolute risk for a meaningful time period |
| Other analyses   | 17  | Report other analyses done—eg analyses of subgroups and interactions, and sensitivity analyses                                                                                                                                                                                                                                                                                                                |

**Discussion**

|                  |    |                                                                                                                                                                            |
|------------------|----|----------------------------------------------------------------------------------------------------------------------------------------------------------------------------|
| Key results      | 18 | Summarise key results with reference to study objectives                                                                                                                   |
| Limitations      | 19 | Discuss limitations of the study, taking into account sources of potential bias or imprecision. Discuss both direction and magnitude of any potential bias                 |
| Interpretation   | 20 | Give a cautious overall interpretation of results considering objectives, limitations, multiplicity of analyses, results from similar studies, and other relevant evidence |
| Generalisability | 21 | Discuss the generalisability (external validity) of the study results                                                                                                      |

**Other information**

|         |    |                                                                                                                                                               |
|---------|----|---------------------------------------------------------------------------------------------------------------------------------------------------------------|
| Funding | 22 | Give the source of funding and the role of the funders for the present study and, if applicable, for the original study on which the present article is based |
|---------|----|---------------------------------------------------------------------------------------------------------------------------------------------------------------|

\*Give information separately for cases and controls in case-control studies and, if applicable, for exposed and unexposed groups in cohort and cross-sectional studies.

**Note:** An Explanation and Elaboration article discusses each checklist item and gives methodological background and published examples of transparent reporting. The STROBE checklist is best used in conjunction with this article (freely available on the Web sites of PLoS Medicine at <http://www.plosmedicine.org/>, Annals of Internal Medicine at <http://www.annals.org/>, and Epidemiology at <http://www.epidem.com/>). Information on the STROBE Initiative is available at [www.strobe-statement.org](http://www.strobe-statement.org).

# BMJ Open

## Description of the epidemiological characteristics of work-related eye injuries in Spain. A retrospective study.

|                                 |                                                                                                                                                                                                                                                                                                                                                                                                                                                                                                                                                                                                                                                                                                                                                                                                                                                                                 |
|---------------------------------|---------------------------------------------------------------------------------------------------------------------------------------------------------------------------------------------------------------------------------------------------------------------------------------------------------------------------------------------------------------------------------------------------------------------------------------------------------------------------------------------------------------------------------------------------------------------------------------------------------------------------------------------------------------------------------------------------------------------------------------------------------------------------------------------------------------------------------------------------------------------------------|
| Journal:                        | <i>BMJ Open</i>                                                                                                                                                                                                                                                                                                                                                                                                                                                                                                                                                                                                                                                                                                                                                                                                                                                                 |
| Manuscript ID                   | bmjopen-2019-035696.R2                                                                                                                                                                                                                                                                                                                                                                                                                                                                                                                                                                                                                                                                                                                                                                                                                                                          |
| Article Type:                   | Original research                                                                                                                                                                                                                                                                                                                                                                                                                                                                                                                                                                                                                                                                                                                                                                                                                                                               |
| Date Submitted by the Author:   | 11-Jul-2020                                                                                                                                                                                                                                                                                                                                                                                                                                                                                                                                                                                                                                                                                                                                                                                                                                                                     |
| Complete List of Authors:       | Martin Prieto, Sergio; Universidad Europea de Madrid Campus de Villaviciosa de Odón, Biomedical and Health Science School<br>Álvarez Peregrina, Cristina; Universidad Europea de Madrid Campus de Villaviciosa de Odón, School of Biomedical and Health Sciences<br>Thuissard-Vasallo, Israel; Universidad Europea de Madrid Campus de Villaviciosa de Odón, Biomedical and Health Science School<br>Catalina Romero, Carlos; Ibermutua (Mutua de accidentes de trabajo y enfermedades profesionales nº 274)<br>Calvo Bonacho, Eva; Ibermutua (Mutua de accidentes de trabajo y enfermedades profesionales nº 274)<br>Villa Collar, César; Universidad Europea de Madrid Campus de Villaviciosa de Odón, Biomedical and Health Science School<br>Sánchez Tena, Miguel Ángel; Universidad Europea de Madrid Campus de Villaviciosa de Odón, Biomedical and Health Science School |
| <b>Primary Subject Heading</b>: | Occupational and environmental medicine                                                                                                                                                                                                                                                                                                                                                                                                                                                                                                                                                                                                                                                                                                                                                                                                                                         |
| Secondary Subject Heading:      | Ophthalmology, Epidemiology                                                                                                                                                                                                                                                                                                                                                                                                                                                                                                                                                                                                                                                                                                                                                                                                                                                     |
| Keywords:                       | ACCIDENT & EMERGENCY MEDICINE, EPIDEMIOLOGY, Health & safety < HEALTH SERVICES ADMINISTRATION & MANAGEMENT, OCCUPATIONAL & INDUSTRIAL MEDICINE, Medical ophthalmology < OPHTHALMOLOGY                                                                                                                                                                                                                                                                                                                                                                                                                                                                                                                                                                                                                                                                                           |
|                                 |                                                                                                                                                                                                                                                                                                                                                                                                                                                                                                                                                                                                                                                                                                                                                                                                                                                                                 |

SCHOLARONE™  
Manuscripts



I, the Submitting Author has the right to grant and does grant on behalf of all authors of the Work (as defined in the below author licence), an exclusive licence and/or a non-exclusive licence for contributions from authors who are: i) UK Crown employees; ii) where BMJ has agreed a CC-BY licence shall apply, and/or iii) in accordance with the terms applicable for US Federal Government officers or employees acting as part of their official duties; on a worldwide, perpetual, irrevocable, royalty-free basis to BMJ Publishing Group Ltd ("BMJ") its licensees and where the relevant Journal is co-owned by BMJ to the co-owners of the Journal, to publish the Work in this journal and any other BMJ products and to exploit all rights, as set out in our [licence](#).

The Submitting Author accepts and understands that any supply made under these terms is made by BMJ to the Submitting Author unless you are acting as an employee on behalf of your employer or a postgraduate student of an affiliated institution which is paying any applicable article publishing charge ("APC") for Open Access articles. Where the Submitting Author wishes to make the Work available on an Open Access basis (and intends to pay the relevant APC), the terms of reuse of such Open Access shall be governed by a Creative Commons licence – details of these licences and which [Creative Commons](#) licence will apply to this Work are set out in our licence referred to above.

Other than as permitted in any relevant BMJ Author's Self Archiving Policies, I confirm this Work has not been accepted for publication elsewhere, is not being considered for publication elsewhere and does not duplicate material already published. I confirm all authors consent to publication of this Work and authorise the granting of this licence.



1  
2  
3  
4  
5  
6  
7  
8  
9  
10  
11  
12  
13  
14  
15  
16  
17  
18  
19  
20  
21  
22  
23  
24  
25  
26  
27  
28  
29  
30  
31  
32  
33  
34  
35  
36  
37  
38  
39  
40  
41  
42  
43  
44  
45  
46  
47  
48  
49  
50  
51  
52  
53  
54  
55  
56  
57  
58  
59  
60

# Description of the epidemiological characteristics of work-related eye injuries in Spain. A retrospective study.

Martín-Prieto, S. Msc<sup>1</sup>, Alvarez-Peregrina, C. PhD<sup>1</sup>, Thuissard-Vasallo, I. Msc<sup>1</sup>, Catalina-Romero, C. PhD<sup>2</sup>, Calvo-Bonacho, E. PhD<sup>2</sup>, Villa-Collar, C. PhD<sup>1</sup>, Sanchez-Tena, MA. PhD<sup>1</sup>

<sup>1</sup> School of Biomedical and Health Sciences, Universidad Europea de Madrid, Madrid 28670, Spain

<sup>2</sup> Ibermutua (Mutua colaboradora con la seguridad social nº 274), Madrid, Spain

Corresponding author: [martin.prieto.sergio@gmail.com](mailto:martin.prieto.sergio@gmail.com)

[cristina.alvarez@universidadeuropea.es](mailto:cristina.alvarez@universidadeuropea.es)

[israeljohn.thuissard@universidadeuropea.es](mailto:israeljohn.thuissard@universidadeuropea.es)

[carloscatalina@ibermutua.es](mailto:carloscatalina@ibermutua.es)

[EvaCalvo@ibermutua.es](mailto:EvaCalvo@ibermutua.es)

[villacollarc@gmail.com](mailto:villacollarc@gmail.com)

[miguelangel.sanchez@universidadeuropea.es](mailto:miguelangel.sanchez@universidadeuropea.es)

**ABSTRACT:**

**OBJECTIVE:** To describe the epidemiological characteristics and trends of work-related eye injuries (WREI) in Spain over a 10-years period by sex, age, and occupational sector.

**DESIGN AND SETTINGS:** A descriptive, retrospective and longitudinal study based on data from workers insured by a labour insurance company in Spain from 2008 to 2018 was presented. The study considered the ratio of the number of WREI per 100000 population and the relative risk of suffering an ocular injury. WREI were characterized by sex, age and occupational sector of injured workers.

**PRIMARY AND SECONDARY OUTCOME MEASURES:** Ratio of the number of WREI.

**PARTICIPANTS:** In Spain, all workers are insured by a labour insurance company that provides cover in the event of work-related accidents. In this study, we have included all workers insured by one of these insurance companies, IBERMUTUA, with workers in all areas of Spain.

**RESULTS:** The study included 50,265 WREI in the company over the 10-year period. Most of the injuries occurred in males (44,445; 88.4%), in 35-44 age group (15,992; 31.8%), and in industry workers (18,899; 42.6%). The average incidence was 429.75 per 100,000 workers insured and 4,273.36 per 100,000 IBERMUTUA accidents (related and not related to eyes). Males, 16-24 age group and industry occupational sector group have the highest incidence for WREI. The incidence of WREI decrease over the study period in all variables. Males have 6,56 (95% CI 6.38-6.75) times more risk of suffering WREI than females. 16-24 age group have 1.77 (95% CI 1.71-1.83) times more risk than in the group of workers older than 55. Finally, industry workers have 7.73 (95% CI 7.55-7.92) times more risk than services workers.

**CONCLUSIONS:** The risks of suffering WREI is higher for males, younger and less experienced workers, and for those who works in a manual task.

**STRENGTHS AND LIMITATIONS OF THIS STUDY:**

- Data is collected from Ibermutua, one of the largest mutual insurance companies in Spain
- This study has the highest number of workers in a research across Europe.
- This study covers a 10 years period, including an economic crisis during the period studied.
- Data is collected from only one mutual insurance company

- Economic activities have been classified according to CNAE-2009 and not divided into specific groups

**FUNDING STATEMENT:** The authors received no financial support for the research, authorship, and/or publication of this article.

**COMPETING INTERESTS STATEMENT:** The authors declare that there are no conflicts of interest regarding the publication of this paper.

**WORD COUNT:** 2938 words.

## INTRODUCTION

An accident at work is defined in European Statistics on Accidents at Work (ESAW) methodology as a discrete occurrence during the course of work which leads to physical or mental harm [1]. According to the Labour Force Survey (LFS), 6.9 million accidents at work occurred in the European Union in 2007, affecting 3.2% of the population [2]. In 2017, a total of 1.33 million of these accidents occurred in Spain, affecting 2.86% of the population [3]. Within these statistics, WREI caused 16,245 workers to be absent from work in 2017 and the eye was the most affected structure in the head.

The prevalence of ocular injuries in developed countries ranges from 88 to 1,920 out of a 100,000 population [4,5], depending on the origin and the type of ocular injury. León Hernández et al. found that 20.2% of all ocular traumas in Spain in 1991 occurred in the workplace [6]. The percentage of ocular injuries related to work changes along with the world from 0.84 to 3.4% [7-9]. It depends on the type of population, the medical attention and the type of injury included in the study.

The universal plan of ocular health established by WHO for the period 2014-2019, has as a main goal decreasing vision impairment around the world [7]. One of their secondary objectives is the generation of scientific data about the magnitude and causes of vision impairment in order to follow the progress and could define priorities. WREI are one of these lesions related to vision impairment. Due to the characteristics of these injuries, they could be prevented by the creation of specific plans that just could be defined through the knowledge about the epidemiology and mechanism of WREI.

The main objective of this study was the epidemiological characterization of WREI causing ocular injury in Spain by sex, age and occupational sectors over a 10-years period.

## METHODS

A descriptive, retrospective and longitudinal study were performed. We analyzed WREI that affects any ocular structure during work time in a mutual insurance company. Study data were provided by IBERMUTUA, a mutual insurance company that collaborates with the Spanish Social Security system. Mutual insurance companies are non-profit private associations of business owners which are duly authorized by the Spanish Ministry of Employment and Social Security and registered with the Special Register operated by the said ministry. They aim to collaborate with the management of the Spanish Social Security system under its direction and auspices with members jointly assuming liability for the situations and with the scope established by the law. On these companies, medical specialists evaluate work accidents reported by the companies it insures, analyzing the work-related injury and its consequences for insured workers. The study period was from 1<sup>st</sup> January 2008 to 31<sup>st</sup> December 2018.

The area of study covered all regions in Spain including Ceuta and Melilla with a population of 46,650,300 in 2018 [7] (latest census). In these years, we analyzed 11,696,259 subjects (table 1), all of them IBERMUTUA-insured workers during the study period, and we related them to 201,167,800 workers in Spain [8].

The research described herein adhered to the tenets of the Declaration of Helsinki and approved by the ethic investigation committee of Universidad Europea de Madrid (CEI-UE). All medical records were anonymous; only statistical information was provided by Ibermutua for research purposes.

## INCLUSION CRITERIA

We studied WREI that affects any ocular structure during work time and in itinere. These injuries were evaluated and classified by medical specialists according to CIE-9-MC classification, correlations with ICD-10 that's the new classification. According to WHO, ICD is the foundation for the identification of health trends and statistics globally, and the international standard for reporting diseases and health conditions. This allows making data comparisons in the same location across different periods. Ocular injuries are included in this classification with codes from 360 to 379. Only injuries where any ocular structure was affected as the main injury were included in the study.

1  
2  
3 We analyzed sex (males and females), age and occupational sector. We established five age groups (16-  
4 24, 25-34, 35-44, 45-54, and  $\geq 55$ ) according to the Labour, Migrations and Social Security Ministry of  
5 Spain [3]. The occupational sector was classified according to the same Ministry's 2009 National Economic  
6 Activities Code (CNAE-2009 in Spanish), whereby occupational sector was divided into four groups:  
7 Agricultura, Industry, Construction, and Services [3].  
8  
9  
10  
11  
12

#### 13 STATISTICAL ANALYSIS

14  
15  
16 Quantitative variables are given as a mean  $\pm$  standard deviation (SD). For qualitative variables, absolute  
17 and relative frequencies are given in percentages. To standardize data, the relationship between the  
18 number of WREI per 100,000 population in Ibermutua (ratio/100,000 population) was calculated.  
19

20  
21  
22 Ibermutua data was divided into Ibermutua insured, which are the total number of workers insured by  
23 IBERMUTUA, and IBERMUTUA accidents. Accidents refer to all the workers insured by Ibermutua that  
24 have suffered an accident in the 10-year period studied. A relative risk (RR) was computed to check the  
25 effects that exist between different groups of sex, age, and occupational sector. To compare different  
26 groups in each variable, the lowest incidence per 100.000 population on each group was considered as  
27 reference. RR shows how many times more of risk have a worker to suffer an accident respect the  
28 reference.  
29  
30  
31  
32  
33  
34  
35

36  
37 A multiple logistic regression has been used to analyze the relationship between WREI and sex, age and  
38 occupation. The risk of suffering WREI was calculated from the Odds Ratio (OR) obtained on this analysis  
39 taking as the reference the group with the lowest incidence.  
40  
41

42  
43 The chi-square test and the Fisher exact test was used to analyze qualitative variables. The student's T-  
44 test and the Mann-Whitney U-Test were used, as appropriate, to search for significant differences  
45 between preferences.  
46  
47  
48

49  
50 The statistical analysis was performed using SPSS, v.21.0 (IBM Corp; Armonk, NY; USA), with  $p < 0.05$   
51 considered significant for all analyses.  
52  
53

#### 54 PATIENT AND PUBLIC INVOLVEMENT

55  
56 No patient involved.  
57  
58  
59  
60

## RESULTS

There were 50,265 WREI in Ibermutua over the 10-year period (Table 1). These accidents affected 0.45% of all workers insured by IBERMUTUA and represented 4.22% of all accidents suffered by Ibermutua-insured workers (1,179,067 total accidents (Table 1)). The average age was  $38.62 \pm 10.57$  and the majority of all injuries occurred in the 35-44 age group (15,992; 32.0%). Within the subject population, 44,445 were male (89.3%) and 5,349 females (10.7%), and industry workers were the most affected group (18,899, 42.6%) (Table 1).

The incidence of WREI was 429.75/100,000 Ibermutua-insured workers and the incidence of WREI among Ibermutua-insured accidents was 4,273.36/100,000.

Workers insured by Ibermutua constituted an average of 5.81% (SD  $\pm 0.221$ ) of all workers in Spain, and the rate of change between workers insured in Ibermutua and total workers in Spain in the study period did not show statistically significant differences ( $p=0.9987$ ) (Figure 1). This rate of change did not show statistically significant differences in services ( $p=0.070$ ) and industry ( $p=0.453$ ). The decrease in Spanish construction workers was statistical significance higher ( $p=0.009$ ) than Ibermutua construction insured over the study period, however, the trend is very similar. This trend was statistical significance different ( $p=0.02$ ) in Agriculture where Spanish workers decrease against Ibermutua insured who increased its number.

### INCIDENCE AND RELATIVE RISK (RR) PER 100,000 IBERMUTUA INSURED

The incidence of WREI over the 10-year period was 680.12 per 100,000 insured for males and 103.63 per 100,000 insured for females. Therefore, males had 6.56 (95% CI 6.38-6.75) times more relative risk of suffering WREI than females (Table 2). If we analyze the evolution over the study period, a decrease in the incidence in both groups was observed. This decrease was statistically significant bigger in males than females ( $p=0.00027$ ) (Figure 2a).

The highest incidence by age group corresponds to the 16-24 group (561.16). The incidence decreases with age. 487.27 in 25-34, 435.57 in 35-44, 369.42 in 45-54, and 316.69 in  $\geq 55$  group (Table 2). The  $\geq 55$  age group is the reference for calculating the RR of suffering a WREI in the other groups because it is the group with the lowest incidence. In this case, RR decreases with age in the same way as the incidence

1  
2  
3 (1.77 (95% CI 1.71-1.83), 1.54 (95% CI 1.51-1.57), 1.38 (95% CI 1.35-1.41), and 1.17 (95% CI 1.13-1.21))  
4  
5 (Table 2). Over the study period, a decrease in the incidence of WREI in all age groups was observed, and  
6  
7 it was statistically significant ( $p<0.05$ ) when we compared 16-24 age group with the other groups, as well  
8  
9 as when we compared 25-34 age group with 45-54 age group ( $p=0.035$ ), and 25-34 age group with  $\geq 55$   
10  
11 age group ( $p=0.021$ ) (Figure 2b).

12  
13  
14 Industry workers were the occupation group with the highest incidence of WREI (1538.17), followed by  
15  
16 Construction workers (1381.52), Agriculture workers (479.65) and, finally, Services workers (198.92)  
17  
18 (Table 2). Therefore, in comparison with Services workers, the risk of suffering an accident (RR) is 7.73  
19  
20 (95% CI 7.55-7.92) times higher in Industry workers, 6.94 (95% CI 6.77-7.12) times higher in Construction  
21  
22 workers, and 1.53 (95% CI 1.45-1.61) times higher in Agriculture workers (Table 2). A decrease in incidence  
23  
24 was observed in all occupation groups over the period. There were statistically significant differences  
25  
26 ( $p<0.05$ ) when we compared all groups with each other, except for the two groups with the highest  
27  
28 incidence, Industry workers and Construction workers ( $p=0.827$ ) (Figure 2c).

#### 30 31 INCIDENCE AND RELATIVE RISK (RR) PER 100,000 IBERMUTUA ACCIDENTS

32  
33 WREI incidence was 5125.26 for males and 1762.18 for females, with a RR 2.91 (95% CI 2.83-2.99) higher  
34  
35 in males (table 2). Incidence throughout the period decreases over time and is statistically significantly  
36  
37 higher in males ( $p<0.001$ ) than females (Figure 3a).

38  
39  
40 In the same way as when we compared the incidence per 100,000 Ibermutua insured, incidence and RR  
41  
42 decrease with age. We observed the highest incidence and RR in 16-24 age group (5083.64 and RR 1.51  
43  
44 (95% CI 1.46-1.56)), followed by 25-34 age group (4800.23 and RR 1.43 (95% CI 1.40-1.46)), 35-44 age  
45  
46 group (4364.93 and RR 1.30 (95% CI 1.27-1.33)), 45-54 years group (3729.39 y RR 1.11 (95% CI 1.07-1.15)),  
47  
48 and, used as a reference and with the lowest incidence of all, the  $\geq 55$  age group (3368.01). WREI  
49  
50 incidence decreased in all age groups over time, and there was a statistically significant ( $p<0.05$ ) decrease  
51  
52 when we compared 16-24 and 25-34 age groups with each other and both groups with the other groups  
53  
54 (Figure 3b).

55  
56 Industry workers suffer the highest incidence and RR of WREI in the four occupation groups (8050.69; RR  
57  
58 3.83 (95% CI 3.74-3.92)), followed by Construction workers (6650; RR 2.54 (95% CI 2.48-5.60)), Agriculture  
59  
60

1  
2  
3 workers (4495.75; RR 1.72 (95% CI 1.64-1.81)), and, with the lowest incidence and RR of all, Services  
4  
5 workers (2615.64), the latter therefore being reference group for RR. Although we observed a decrease  
6  
7 in incidence over the period, it was not statistically significant when we compared different groups (Figure  
8  
9 3c).

#### 10 11 INTERACTION ANALYSIS BETWEEN SEX, AGE AND OCCUPATION

12  
13  
14 Table 3 shows how according to the the results of the multiple logistic regression analysis, there was  
15  
16 significant relationship between WREI and sex, age and occupation. Males had 80.11% (95% CI 79.61-  
17  
18 80.61) more risk of suffering WREI than females. In addition, 16-24 age group showed the highest risk of  
19  
20 suffering WREI compared to the lowest group (>55 years) (64.15% (95% CI 63.11-65.19)) and followed by  
21  
22 the 25-34 age group (60.79% (CI 95% 59.93-61.65)), the 35-44 age group (58.24% (CI 95% 57.37-59.11)  
23  
24 and the 45-54 age group (55.45% (CI 95% 54.50-56.39)).

25  
26  
27 Workers from the Industry group had the highest risk of suffering WREI compared with those from the  
28  
29 Services group (85.29% (CI 95% 85.00-85.57)). They were followed by workers from the Construction  
30  
31 (80.85% (CI 95% 80.43-81.26)) and Agriculture sectors (53.50% (CI 95% 52.33-54.93)).

#### 32 33 **DISCUSSION**

34  
35  
36 Of all the long-term studies we have observed in Europe, this is the one which covers the largest area and  
37  
38 the highest number of cases. The close relationship between Ibermutua-insured workers and the  
39  
40 evolution in the number of workers in Spain ( $p=0.9987$ ) indicates the importance of our data analysis. The  
41  
42 highest WREI incidence per 100.000 Ibermutua insured/accidents and the highest relative risk (RR) was  
43  
44 observed in males, aged between 16-24 that worked in the Industry sector. The evolution of WREI  
45  
46 incidence per 100.000 insured/accidents over the study period showed a decrease in all the groups (both  
47  
48 sexes and all ages and sectors)

49  
50  
51 The percentage of WREI in our study was lower than Gomez Villa et al. observed in two villages on the  
52  
53 island of Mallorca (Spain) (0.84%) [9], Torino (Italy) (1.3%) [10] and much lower than another with a  
54  
55 similar number of study cases in the USA (3.4%) [11]. The difference was maybe due to the smaller area  
56  
57 and population (only two villages and 50,851 workers) and the shorter study period (two years) in  
58  
59 Mallorca and the population in the USA and Torino is not only insured workers.



1  
2  
3 The total incidence of WREI falls between the values of other studies [4,5] and is very similar to that found  
4 by Karlsen et al. in Wisconsin (USA) in 1986 (423/100,000) [12]. However, in all of these studies, the  
5 incidence does not relate exclusively to work-related injuries. If we compare only with WREI, in our study  
6 we observe higher incidence than in Hong Kong (around 125/100,000) [13]. However, it is very difficult to  
7 compare these two values because the Hong Kong study covered a period of only 3 months.  
8  
9

10  
11  
12  
13 The higher impact on males is similar to other studies where the percentage of eye injuries in males was  
14 between 87 and 95.1% [5,14–16]. A very similar RR was observed in Modena (Italy) (7:1 male/female  
15 ratio) [5], although it was lower in Taiwan (3.99) [14]. It is important to highlight that these studies  
16 included not only the active population, so results are Eye Injuries but not only related to work. This  
17 higher impact on males might be due to the different occupations in each group too. In the last quarter  
18 of 2018 in Spain, there were 2.8 times more men than women working in Industry and 10.6 times more  
19 in Construction. These are the two workers' occupational sectors where the highest WREI incidence was  
20 observed in our study. However, there were 1.054 million more female workers in Services [17].  
21  
22

23  
24  
25  
26  
27  
28  
29  
30  
31  
32  
33  
34  
35  
36  
37  
38  
39  
40  
41  
42  
43  
44  
45  
46  
47  
48  
49  
50  
51  
52  
53  
54  
55  
56  
57  
58  
59  
60  
35-44 was the most affected age group in our study. Our data match those found in an area in the  
southwest of China [16]. The highest percentage observed in other studies was in the 25-34 age group in  
Western Turkey [15] and the 16-24 age group in Modena (Italy) [5]. However, we observed more incidence  
of WREI for 100,000 insured in the lowest age group (16-24) in our study, and this incidence decreases  
with age. We only analyzed workers population, and we think this is why we found more eye injuries in  
the lowest age group. These workers have less experience and perform more manual jobs too. Our results  
suggest that work-experience plays a protective role in Spanish workers as well as in other countries [5,  
15, 18].

As in other studies [5], we observed the highest incidence and percentage of WREI in Industry workers.  
Agriculture was the most affected group in other studies [19,20] but in all of them, Services was the least  
affected group. This is due to the lower risk of trauma or other external agents that can affect Services  
workers.

The multiple logistic regression analysis to study the interaction of the different variables, confirmed the  
results from the descriptive analysis. So, the highest incidence was observed in younger workers (aged  
between 16 and 24) and in males, confirming results from previous studies [21].

1  
2  
3 When we analyzed the evolution of WREI for 100,000 Ibermutua insured/accidents, we standardized data  
4 and eliminated WREI due to population variation. Therefore, we need to find reasons for the reduction in  
5 WREI in all study variables. This generalized decrease might be the result of unknown specific eye  
6 protection plans proposed by the companies and Ibermutua. Variation in occupational sector incidence  
7 over the study period could be another reason for this decrease. So, sectors with lower risk (agriculture  
8 and services) have increased his proportion (81% in 2018 vs 73% in 2008) and this makes that incidence  
9 of WREI also decrease in general.  
10  
11

12  
13  
14  
15  
16  
17  
18 There are no studies that compare WREI for accidents only (as opposed to total population). We  
19 considered it worth making this comparison to find out the mechanism and the importance that WREI  
20 have in total accidents in Spain. Using this data could make it easier to devise specific programs aimed at  
21 reducing ocular accidents and the associated costs.  
22  
23

24  
25  
26 The high number of data of our database makes that a certain number of cases in the different variables  
27 was missing. Because of that, we don't have the same number of cases in all variables. These missed cases  
28 were not relevant in the sex and age group but were important in occupational sector groups (Table 1).  
29 This becomes a limitation of our study and should be taken into account in future research in this area.  
30  
31  
32 Another limitation was the difficulty to compare with other studies where eye injuries are not only related  
33 to work, as far as they are carried out in the hospital's emergency departments.  
34  
35  
36  
37  
38

## 39 **CONCLUSIONS**

40  
41 There is a higher risk of WREI for workers from Industry and Construction when compare to Agriculture  
42 and Services. Our results suggesting that experience is also an important factor for WREI, because  
43 younger workers shown more risk of suffering WREI. With these results, the main risk factors for  
44 suffering WREI was to be male, to be young and less experienced and work in manual task.  
45  
46  
47  
48

49  
50 According to these results, specific protection programs for higher protection in Industry and Services  
51 sectors should be proposed. We suggest the implantation of protective glasses and face shields in  
52 Industry workers and visual ergonomic measures or instilling eye drops in workers of the services sector.  
53  
54  
55  
56  
57  
58  
59  
60

## BIBLIOGRAPHY

1. Eurostat. Statistics Explained - Accidents at work statistics [Internet]. Eurostat Statistics Explained. 2015 [cited 2019 Oct 1]. p. 1–7. Available from: <http://ec.europa.eu/eurostat/statistics-explained/>
2. Eurostat. Health and safety at work in Europe (1999–2007) - A statistical portrait [Internet]. Publications Office of the European Union. 2010. 96 p. Available from: <http://ec.europa.eu/eurostat/documents/3217494/5718905/KS-31-09-290-EN.PDF/88eef9f7-c229-40de-b1cd-43126bc4a946>
3. 1Dirección General de Estadística y Análisis Sociolaboral D. Resumen. Estadística de Accidentes de Trabajo 2017 [Internet]. Ministerio de empleo y seguridad Social. 2017 [cited 2019 Oct 1]. p. 9. Available from: [http://www.mitramiss.gob.es/estadisticas/eat/eat17/ATR\\_2017\\_Completa.pdf](http://www.mitramiss.gob.es/estadisticas/eat/eat17/ATR_2017_Completa.pdf)
4. Sahraravand A, Haavisto AK, Holopainen JM, Leivo T. Ocular traumas in working age adults in Finland – Helsinki Ocular Trauma Study. *Acta Ophthalmol*. 2017 May;95(3):288–94.
5. Gobba F, Dall’Olio E, Modenese A, De Maria M, Campi L, Cavallini GM. Work-related eye injuries: A relevant health problem. main epidemiological data from a highly-industrialized area of northern Italy. *Int J Environ Res Public Health*. 2017 Jun 6;14(6):604.
6. León Hernández FA, Taboada Esteve JF, Guimerá V, Gálvez-Martínez J, Pérez Salvador JL, Gil A, et al. Primer año del estudio multicéntrico español sobre traumatismos oculares. [Internet]. Vol. 60, Archivos de la Sociedad Española de Oftalmología. 1991 [cited 2019 Oct 2]. p. 79–88. Available from: <https://dialnet.unirioja.es/servlet/articulo?codigo=6768620>
7. Instituto Nacional de estadística (INE). España en cifras 2019 [Internet]. Publicaciones oficiales BOE. 2019 [cited 2019 Jul 30]. p. 1–60. Available from: [http://www.ine.es/prodyser/espa\\_cifras/2019/2/index.html](http://www.ine.es/prodyser/espa_cifras/2019/2/index.html)
8. Instituto Nacional de estadística (INE). Sección prensa / Encuesta de Población Activa (EPA). Serie histórica (Datos en miles de personas) [Internet]. 2014 [cited 2019 Dec 18]. Available from: [https://www.ine.es/prensa/epa\\_tabla.htm](https://www.ine.es/prensa/epa_tabla.htm)
9. Gómez Villa P, Ladaría Literas A. Patología oftálmica en el medio laboral: ergooftalmología [Internet]. 2007 [cited 2019 Dec 28]. p. 1–85. Available from: [http://diposit.ub.edu/dspace/bitstream/2445/7101/1/PATOLOGIA\\_OFTALMICA.pdf](http://diposit.ub.edu/dspace/bitstream/2445/7101/1/PATOLOGIA_OFTALMICA.pdf)
10. Fea A, Bosone A, Rolle T, Grignolo FM. Eye injuries in an Italian urban population: Report of 10620 cases admitted to an eye emergency department in Torino. *Graefes Arch Clin Exp Ophthalmol* [Internet]. 2008 Feb;246(2):175–9.
11. Stagg BC, Shah MM, Talwar N, Padovani-Claudio DA, Woodward MA, Stein JD. Factors Affecting Visits to the Emergency Department for Urgent and Nonurgent Ocular Conditions. *Ophthalmology* [Internet]. 2017/01/31. 2017 May;124(5):720–9. Available from: <https://pubmed.ncbi.nlm.nih.gov/28159379>
12. Klein BEK. The Incidence of Acute Hospital-Treated Eye Injuries. *Arch Ophthalmol*. 1986 Oct 1;104(10):1473–6.
13. Yu TSI, Liu H, Hui K. A Case-Control Study of Eye Injuries in the Workplace in Hong Kong. *Ophthalmology*. 2004 Jan 1;111(1):70–4.
14. Ho CK, Yen YL, Chang CH, Chiang HC, Shen YY, Chang PY. Epidemiologic study on work-related eye injuries in Kaohsiung, Taiwan. *Kaohsiung J Med Sci* [Internet]. 2007 Sep;23(9):463–9. Available from: [http://doi.wiley.com/10.1016/S1607-551X\(08\)70054-8](http://doi.wiley.com/10.1016/S1607-551X(08)70054-8)
15. Serinken M, Turkcuer I, Cetin EN, Yilmaz A, Elicabuk H, Karcioğlu O. Causes and characteristics of work-related eye injuries in western Turkey. *Indian J Ophthalmol*. 2013 Sep;61(9):497–501.
16. Cai M, Zhang J. Epidemiological characteristics of work-related ocular trauma in southwest region of China. *Int J Environ Res Public Health*. 2015 Aug 19;12(8):9864–75.
17. Instituto Nacional de estadística (INE). Encuesta de población Activa (EPA) 2018T4. [Internet]. Resultados Nacionales. Ocupados por grupo de edad, sexo y sector económico. 2018 [cited 2019 Mar 8]. Available from: <http://www.ine.es/jaxiT3/Tabla.htm?t=3959> HYPERLINK "http://www.ine.es/jaxiT3/Tabla.htm?t=3959&L=0"& HYPERLINK "http://www.ine.es/jaxiT3/Tabla.htm?t=3959&L=0" L=0
18. Knyazer B, Bilenko N, Levy J, Lifshitz T, Belfair N, Klemperer I, Yabe T. Open globe eye injury characteristics and prognostic factors in Southern Israel: A retrospective epidemiologic review of 10 years experience. *Isr Med Assoc J*. 2013 Mar; 15(3):158-62

- 1  
2  
3 19. Jovanovic N, Peek-Asa C, Swanton A, Young T, Alajbegovic-Halimic J, Cavaljuga S, et al.  
4 Prevalence and risk factors associated with work-related eye injuries in Bosnia and Herzegovina.  
5 *Int J Occup Environ Health*. 2016 Oct 4;22(4):325–32.  
6 20. Cruciani F, Lucchetta F, Regine F, Salandri Y, Abdolrahimzadeh B, Gabrieli B. Work-Related  
7 Accidents of Ophthalmologic Interest in Italy During 1986–1991. *Ophthalmologica*.  
8 1997;211(4):251–5.  
9 21. Forrest K, Cali JM. Epidemiology of lifetime Work-Related Eye Injuries in the U.S. Population  
10 associated with one or more lost days of work. *Ophthalmic Epidemiol*. May-Jun 2009;16(3):156-  
11 62. Available from: <https://doi.org/10.1080/09286580902738175>  
12  
13  
14  
15  
16  
17  
18  
19  
20  
21  
22  
23  
24  
25  
26  
27  
28  
29  
30  
31  
32  
33  
34  
35  
36  
37  
38  
39  
40  
41  
42  
43  
44  
45  
46  
47  
48  
49  
50  
51  
52  
53  
54  
55  
56  
57  
58  
59  
60

For peer review only

**CONTRIBUTORSHIP STATEMENT:**

Alvarez-Peregrina, Villa-Collar and Sanchez-Tena designed the study.

Catalina-Romero and Calvo-Bonacho obtained the data.

The obtained data was analyzed by Martín-Prieto and Thuissard-Vasallo.

All authors contributed to the writing of the manuscript.

**COMPETING INTERESTS**

The authors declare that there are no conflicts of interest regarding the publication of this paper.

**FUNDING**

The authors received no financial support for the research, authorship, and/or publication of this article.

**DATA SHARING STATEMENT**

All data relevant to the study are included in the article or uploaded as supplementary information. Data are also available upon reasonable request.

**Table 1:** Total cases (N) of Ibermutua-insured, Ibermutua accidents and total WREI (Work-related eye injuries) according to sex, age and workers occupation. Losses: total number of losses out of total number of cases (50265) of WREI in all different groups.

|                     | TOTAL       |      | LOSSES |      |
|---------------------|-------------|------|--------|------|
|                     | N           | %    | N      | %    |
| Ibermutua insured   | 11,696,259  |      |        |      |
| Ibermutua accidents | 1,179,067   |      |        |      |
| Spanish workers     | 201,167,800 |      |        |      |
| WREI                | 50,265      |      |        |      |
| Sex WREI            |             |      |        |      |
| Male                | 44,445      | 89.3 |        |      |
| Female              | 5,349       | 10.7 |        |      |
| Total               | 49,794      | 100  | 471    | 0.9  |
| Age group WREI      |             |      |        |      |
| 16-24               | 4,388       | 8.8  |        |      |
| 25-34               | 14,981      | 29.9 |        |      |
| 35-44               | 15,992      | 32.0 |        |      |
| 45-54               | 10,278      | 20.5 |        |      |
| >55                 | 4,390       | 8.8  |        |      |
| Total               | 50,029      | 100  | 236    | 0.5  |
| Occupation WREI     |             |      |        |      |
| Agriculture         | 1,624       | 3.7  |        |      |
| Industry            | 18,899      | 42.6 |        |      |
| Construction        | 10,455      | 23.6 |        |      |
| Services            | 13,394      | 30.2 |        |      |
| Total               | 44,369      | 100  | 5,893  | 11.7 |

**Table 2:** Incidence of WREI over 100,000 insured and 1000,000 accidents and relative risk (RR) of WREI over a 10-year period according to sex, age and sector.

|                   | WREI incidence per 100,000 accidents | Risk percentage of WREI (%)  | WREI incidence per 100,000 accidents | RR WREI according to insured |           | RR WREI according to accidents |           |
|-------------------|--------------------------------------|------------------------------|--------------------------------------|------------------------------|-----------|--------------------------------|-----------|
|                   |                                      |                              |                                      | RR                           | 95% CI    | RR                             | 95% CI    |
| <b>Sex</b>        |                                      |                              |                                      |                              |           |                                |           |
| Total             | 425.73                               |                              | 4253.29                              |                              |           |                                |           |
| Male              | 680.13                               | 80.11% (95% CI 79.61-80.61)  | 5125.27                              | 6.56                         | 6.38-6.75 | 2.91                           | 2.83-2.99 |
| Female            | 103.63                               | REF                          | 1762.19                              | REF                          |           | REF                            |           |
| <b>Age</b>        |                                      |                              |                                      |                              |           |                                |           |
| Total             | 427.74                               |                              | 4273.36                              |                              |           |                                |           |
| 16-24 years       | 561.16                               | 64.15% (95% CI 63.11-65.19)  | 5083.65                              | 1.77                         | 1.71-1.83 | 1.51                           | 1.46-1.56 |
| 25-34 years       | 487.27                               | 60.79% (CI 95% 59.93-61.65)  | 4800.23                              | 1.54                         | 1.51-1.57 | 1.43                           | 1.40-1.46 |
| 35-44 years       | 435.58                               | 58.24% (CI 95% 57.37-59.11)  | 4364.94                              | 1.38                         | 1.35-1.41 | 1.30                           | 1.27-1,33 |
| 45-54 years       | 369.43                               | 55.45% (CI 95% 54.50-56.39). | 3729.40                              | 1.17                         | 1.13-1.21 | 1.11                           | 1,07-1.15 |
| >55 Years         | 316.69                               | REF                          | 3368.01                              | REF                          |           | REF                            |           |
| <b>Occupation</b> |                                      |                              |                                      |                              |           |                                |           |
| Total             | 479.65                               |                              | 4719.61                              |                              |           |                                |           |
| Agriculture       | 305.14                               | 53.50% (CI 95% 52.33-54.93)  | 4495.75                              | 1.53                         | 1.45-1.61 | 1.72                           | 1.64-1.81 |
| Industry          | 1538.18                              | 85.29% (CI 95% 85.00-85.57)  | 8050.69                              | 7.73                         | 7.55-7.92 | 3.83                           | 3.74-3.92 |
| Construction      | 1381.53                              | 80.85% (CI 95% 80.43-81.26)  | 6650.00                              | 6.94                         | 6.77-7.12 | 2.54                           | 2.48-2.60 |
| Services          | 198.92                               | REF                          | 2615.65                              | REF                          |           | REF                            |           |

Table 3. Relationship between WREI and study variables according to multivariate logistic regression analysis

|              | OR (95% CI)        | p-value |
|--------------|--------------------|---------|
| Sex          |                    |         |
| Male         | 4,030(3,904-4,159) | < 0,001 |
| Female       | REF                | REF     |
| Age (years)  |                    |         |
| 16-24 years  | 1,790(1,711-1,873) | < 0,001 |
| 25-34 years  | 1,551(1,496-1,608) | < 0,001 |
| 35-44 years  | 1,395(1,346-1,446) | < 0,001 |
| 45-54 years  | 1,245(1,198-1,293) | < 0,001 |
| >55 Years    | REF                | REF     |
| Occupation   |                    |         |
| Agriculture  | 1,151(1,098-1,219) | < 0,001 |
| Industry     | 4,222(4,111-4,336) | < 0,001 |
| Construction | 5,799(5,668-5,933) | < 0,001 |
| Services     | REF                | REF     |



1  
2  
3 Figure Legends:  
4  
5

6 **Figure 1:** Relation between Ibermutua insured (triangle line) and Spanish workers (circle  
7 line) over the study period. There were no statistically significant differences in  
8 evolution over the 2008-2018 period ( $p=0.9987$ ).  
9

10  
11 **Figure 2:** Evolution of WREI incidence per 100000 Ibermutua insured over the study  
12 period. A decrease in incidence according to sex (A), age (B) and occupation (C) was  
13 observed.  
14  
15

16  
17 **Figure 3:** Evolution of WREI incidence per 100000 Ibermutua accidents over the study  
18 period. A decrease in incidence according to sex (A), age (B) and occupation (C) was  
19 observed.  
20  
21  
22  
23  
24  
25  
26  
27  
28  
29  
30  
31  
32  
33  
34  
35  
36  
37  
38  
39  
40  
41  
42  
43  
44  
45  
46  
47  
48  
49  
50  
51  
52  
53  
54  
55  
56  
57  
58  
59  
60

### BMJ Open

1  
2  
3  
4  
5  
6  
7  
8  
9  
10  
11  
12  
13  
14  
15  
16  
17  
18  
19  
20  
21  
22  
23  
24  
25  
26





BMJ Open

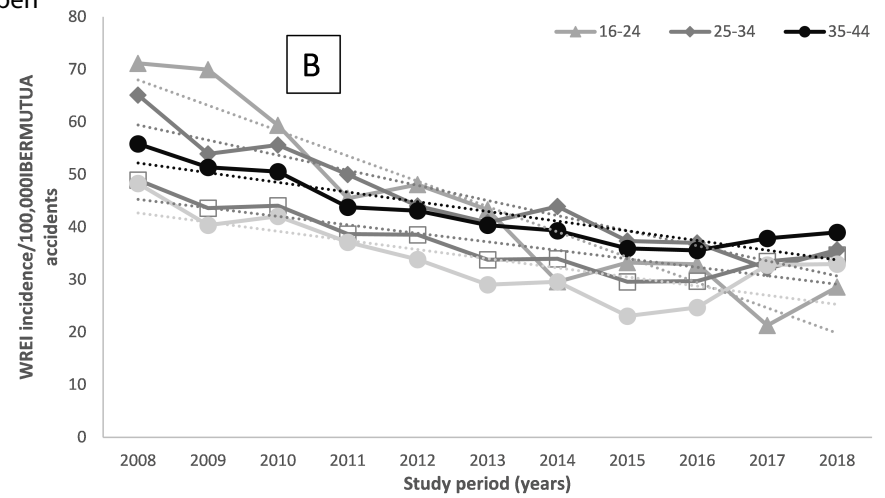

1  
2  
3  
4  
5  
6  
7  
8  
9  
10  
11  
12  
13  
14  
15  
16  
17  
18  
19  
20  
21  
22  
23  
24  
25  
26  
27  
28  
29  
30

## STROBE Statement—checklist of items that should be included in reports of observational studies

|                              | Item No | Recommendation                                                                                                                                                                                                                                                                                                                                                                                                                                                                                                                                                                                                                                                                                   |
|------------------------------|---------|--------------------------------------------------------------------------------------------------------------------------------------------------------------------------------------------------------------------------------------------------------------------------------------------------------------------------------------------------------------------------------------------------------------------------------------------------------------------------------------------------------------------------------------------------------------------------------------------------------------------------------------------------------------------------------------------------|
| <b>Title and abstract</b>    | 1       | (a) Indicate the study's design with a commonly used term in the title or the abstract<br>(b) Provide in the abstract an informative and balanced summary of what was done and what was found                                                                                                                                                                                                                                                                                                                                                                                                                                                                                                    |
| <b>Introduction</b>          |         |                                                                                                                                                                                                                                                                                                                                                                                                                                                                                                                                                                                                                                                                                                  |
| Background/rationale         | 2       | Explain the scientific background and rationale for the investigation being reported                                                                                                                                                                                                                                                                                                                                                                                                                                                                                                                                                                                                             |
| Objectives                   | 3       | State specific objectives, including any prespecified hypotheses                                                                                                                                                                                                                                                                                                                                                                                                                                                                                                                                                                                                                                 |
| <b>Methods</b>               |         |                                                                                                                                                                                                                                                                                                                                                                                                                                                                                                                                                                                                                                                                                                  |
| Study design                 | 4       | Present key elements of study design early in the paper                                                                                                                                                                                                                                                                                                                                                                                                                                                                                                                                                                                                                                          |
| Setting                      | 5       | Describe the setting, locations, and relevant dates, including periods of recruitment, exposure, follow-up, and data collection                                                                                                                                                                                                                                                                                                                                                                                                                                                                                                                                                                  |
| Participants                 | 6       | (a) <i>Cohort study</i> —Give the eligibility criteria, and the sources and methods of selection of participants. Describe methods of follow-up<br><i>Case-control study</i> —Give the eligibility criteria, and the sources and methods of case ascertainment and control selection. Give the rationale for the choice of cases and controls<br><i>Cross-sectional study</i> —Give the eligibility criteria, and the sources and methods of selection of participants<br>(b) <i>Cohort study</i> —For matched studies, give matching criteria and number of exposed and unexposed<br><i>Case-control study</i> —For matched studies, give matching criteria and the number of controls per case |
| Variables                    | 7       | Clearly define all outcomes, exposures, predictors, potential confounders, and effect modifiers. Give diagnostic criteria, if applicable                                                                                                                                                                                                                                                                                                                                                                                                                                                                                                                                                         |
| Data sources/<br>measurement | 8*      | For each variable of interest, give sources of data and details of methods of assessment (measurement). Describe comparability of assessment methods if there is more than one group                                                                                                                                                                                                                                                                                                                                                                                                                                                                                                             |
| Bias                         | 9       | Describe any efforts to address potential sources of bias                                                                                                                                                                                                                                                                                                                                                                                                                                                                                                                                                                                                                                        |
| Study size                   | 10      | Explain how the study size was arrived at                                                                                                                                                                                                                                                                                                                                                                                                                                                                                                                                                                                                                                                        |
| Quantitative variables       | 11      | Explain how quantitative variables were handled in the analyses. If applicable, describe which groupings were chosen and why                                                                                                                                                                                                                                                                                                                                                                                                                                                                                                                                                                     |
| Statistical methods          | 12      | (a) Describe all statistical methods, including those used to control for confounding<br>(b) Describe any methods used to examine subgroups and interactions<br>(c) Explain how missing data were addressed<br>(d) <i>Cohort study</i> —If applicable, explain how loss to follow-up was addressed<br><i>Case-control study</i> —If applicable, explain how matching of cases and controls was addressed<br><i>Cross-sectional study</i> —If applicable, describe analytical methods taking account of sampling strategy<br>(e) Describe any sensitivity analyses                                                                                                                                |

Continued on next page

1  
2  
3  
4  
5  
6  
7  
8  
9  
10  
11  
12  
13  
14  
15  
16  
17  
18  
19  
20  
21  
22  
23  
24  
25  
26  
27  
28  
29  
30  
31  
32  
33  
34  
35  
36  
37  
38  
39  
40  
41  
42  
43  
44  
45  
46  
47  
48  
49  
50  
51  
52  
53  
54  
55  
56  
57  
58  
59  
60**Results**

|                  |     |                                                                                                                                                                                                                                                                                                                                                                                                               |
|------------------|-----|---------------------------------------------------------------------------------------------------------------------------------------------------------------------------------------------------------------------------------------------------------------------------------------------------------------------------------------------------------------------------------------------------------------|
| Participants     | 13* | (a) Report numbers of individuals at each stage of study—eg numbers potentially eligible, examined for eligibility, confirmed eligible, included in the study, completing follow-up, and analysed<br>(b) Give reasons for non-participation at each stage<br>(c) Consider use of a flow diagram                                                                                                               |
| Descriptive data | 14* | (a) Give characteristics of study participants (eg demographic, clinical, social) and information on exposures and potential confounders<br>(b) Indicate number of participants with missing data for each variable of interest<br>(c) <i>Cohort study</i> —Summarise follow-up time (eg, average and total amount)                                                                                           |
| Outcome data     | 15* | <i>Cohort study</i> —Report numbers of outcome events or summary measures over time<br><i>Case-control study</i> —Report numbers in each exposure category, or summary measures of exposure<br><i>Cross-sectional study</i> —Report numbers of outcome events or summary measures                                                                                                                             |
| Main results     | 16  | (a) Give unadjusted estimates and, if applicable, confounder-adjusted estimates and their precision (eg, 95% confidence interval). Make clear which confounders were adjusted for and why they were included<br>(b) Report category boundaries when continuous variables were categorized<br>(c) If relevant, consider translating estimates of relative risk into absolute risk for a meaningful time period |
| Other analyses   | 17  | Report other analyses done—eg analyses of subgroups and interactions, and sensitivity analyses                                                                                                                                                                                                                                                                                                                |

**Discussion**

|                  |    |                                                                                                                                                                            |
|------------------|----|----------------------------------------------------------------------------------------------------------------------------------------------------------------------------|
| Key results      | 18 | Summarise key results with reference to study objectives                                                                                                                   |
| Limitations      | 19 | Discuss limitations of the study, taking into account sources of potential bias or imprecision. Discuss both direction and magnitude of any potential bias                 |
| Interpretation   | 20 | Give a cautious overall interpretation of results considering objectives, limitations, multiplicity of analyses, results from similar studies, and other relevant evidence |
| Generalisability | 21 | Discuss the generalisability (external validity) of the study results                                                                                                      |

**Other information**

|         |    |                                                                                                                                                               |
|---------|----|---------------------------------------------------------------------------------------------------------------------------------------------------------------|
| Funding | 22 | Give the source of funding and the role of the funders for the present study and, if applicable, for the original study on which the present article is based |
|---------|----|---------------------------------------------------------------------------------------------------------------------------------------------------------------|

\*Give information separately for cases and controls in case-control studies and, if applicable, for exposed and unexposed groups in cohort and cross-sectional studies.

**Note:** An Explanation and Elaboration article discusses each checklist item and gives methodological background and published examples of transparent reporting. The STROBE checklist is best used in conjunction with this article (freely available on the Web sites of PLoS Medicine at <http://www.plosmedicine.org/>, Annals of Internal Medicine at <http://www.annals.org/>, and Epidemiology at <http://www.epidem.com/>). Information on the STROBE Initiative is available at [www.strobe-statement.org](http://www.strobe-statement.org).
